# Supplementary material
Source: publisher site journal article supplement (https://www.spandidos-publications.com/906/downloadSupplementary)
Supplement: Supplementary file 1 [file downloadSupplementary]

Figure S1. GO and KEGG pathways, protein domains and cluster analysis of crotonylated proteins in immunoglobulin A nephropathy. GO analysis of crotonylated proteins in (A) cellular component.

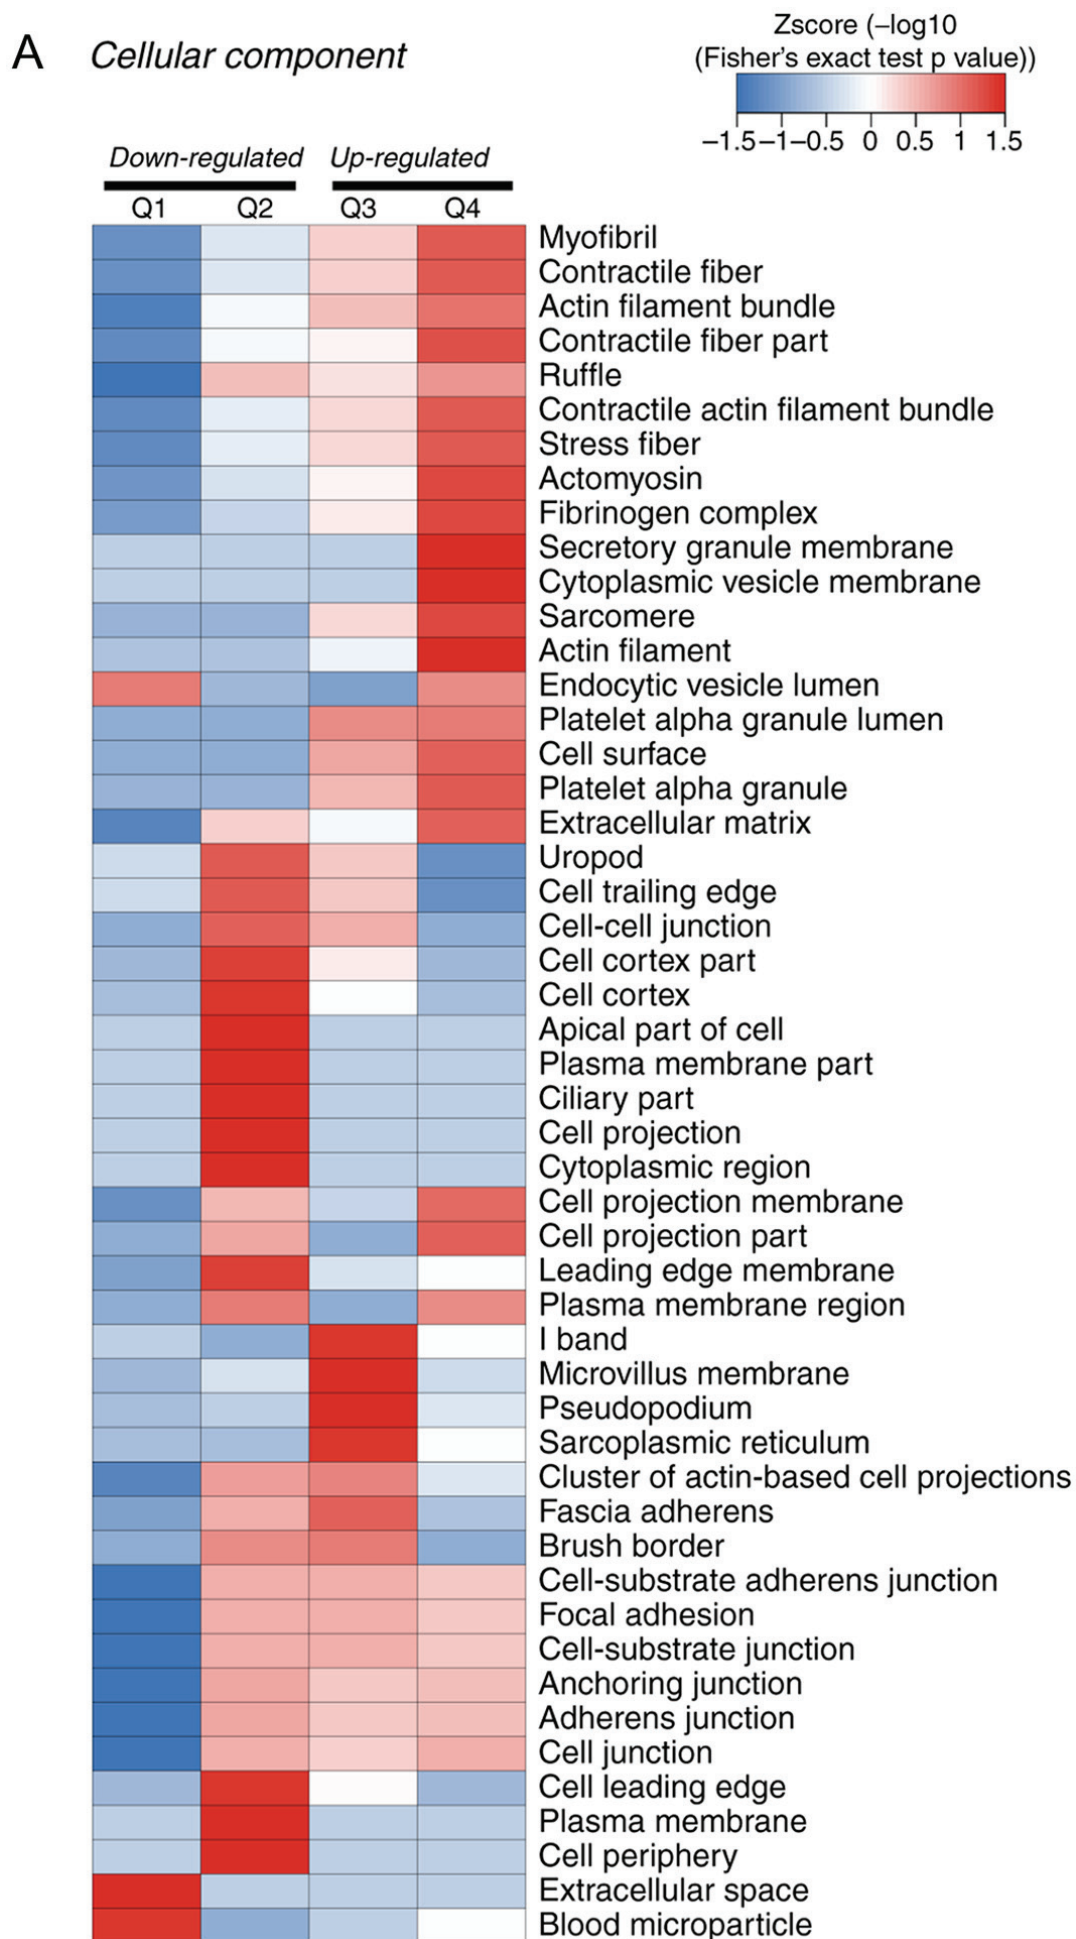

Figure S1. Continued. GO analysis of crotonylated proteins in (B) biological process.

**B** *Biological process*

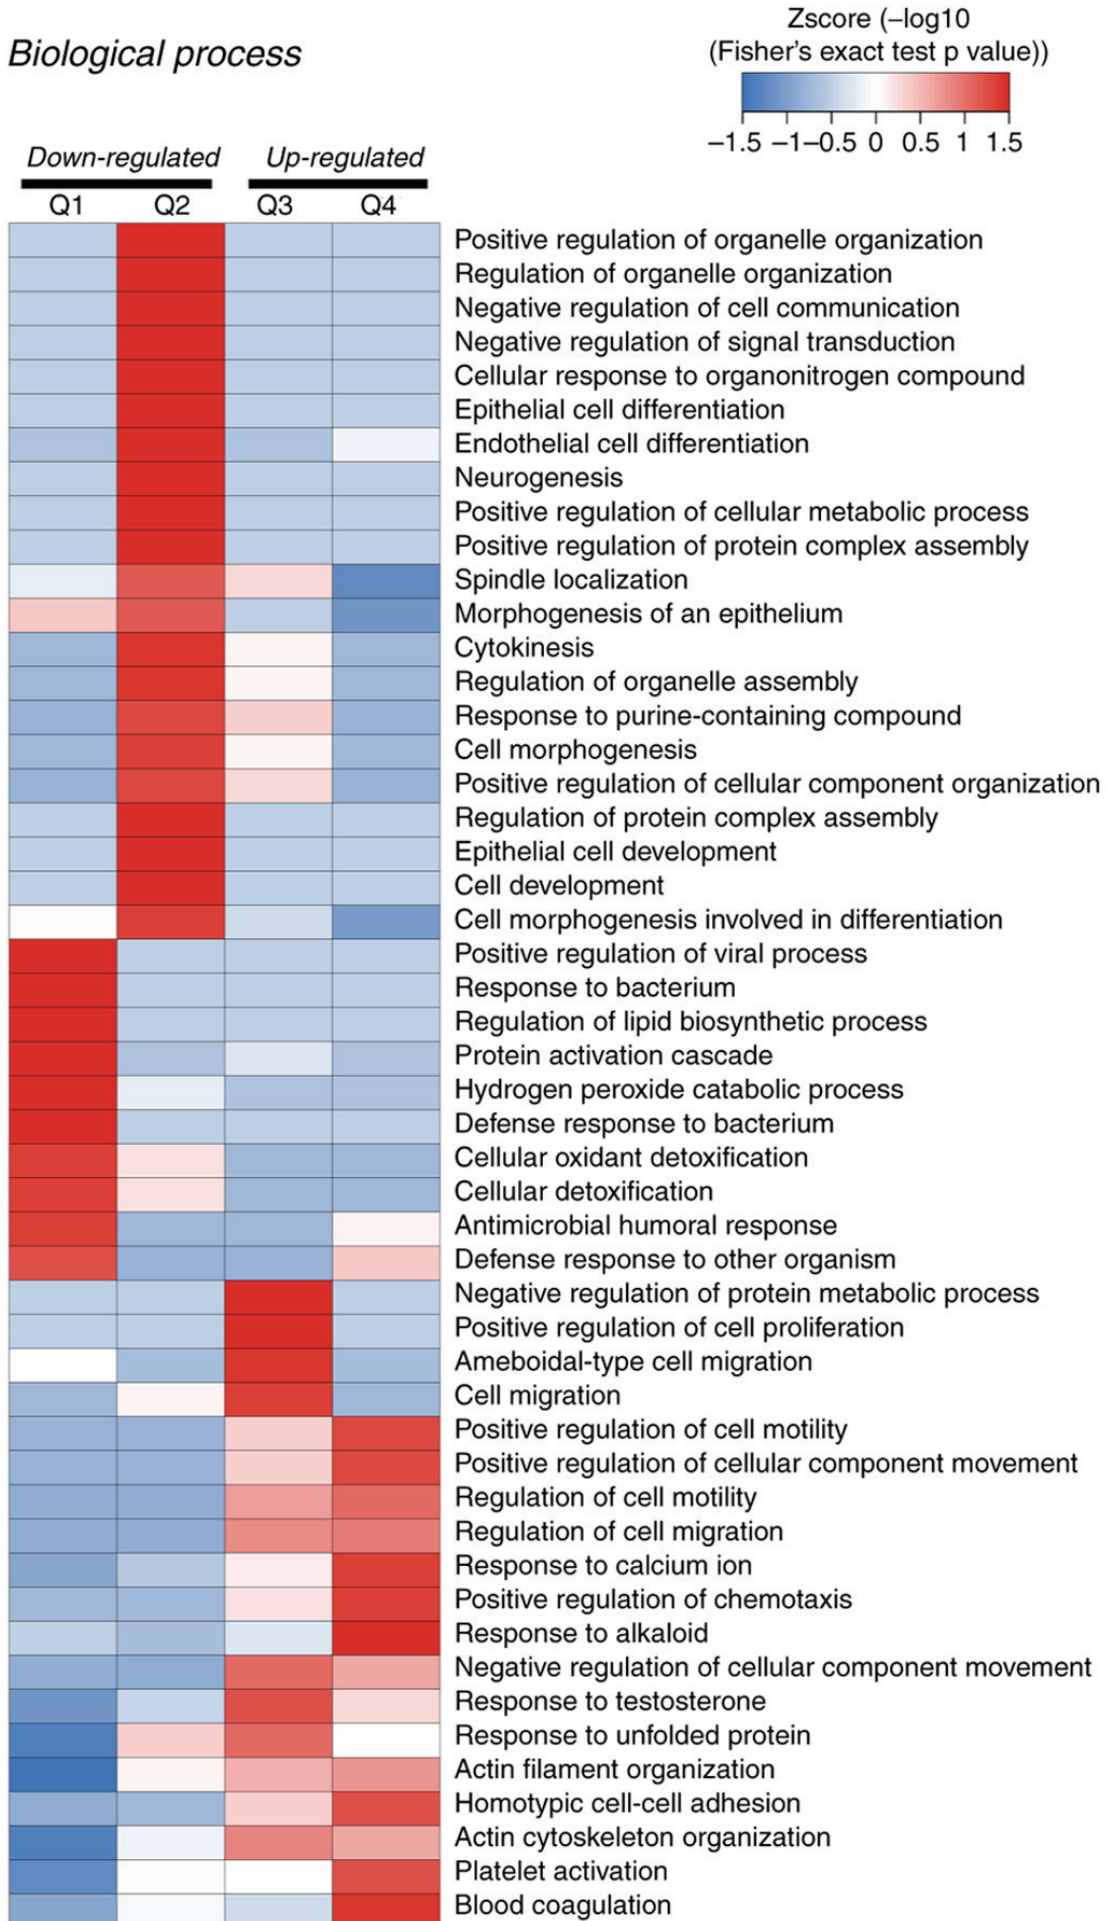

Figure S1. Continued. GO analysis of crotonylated proteins in (C) molecular function categories.

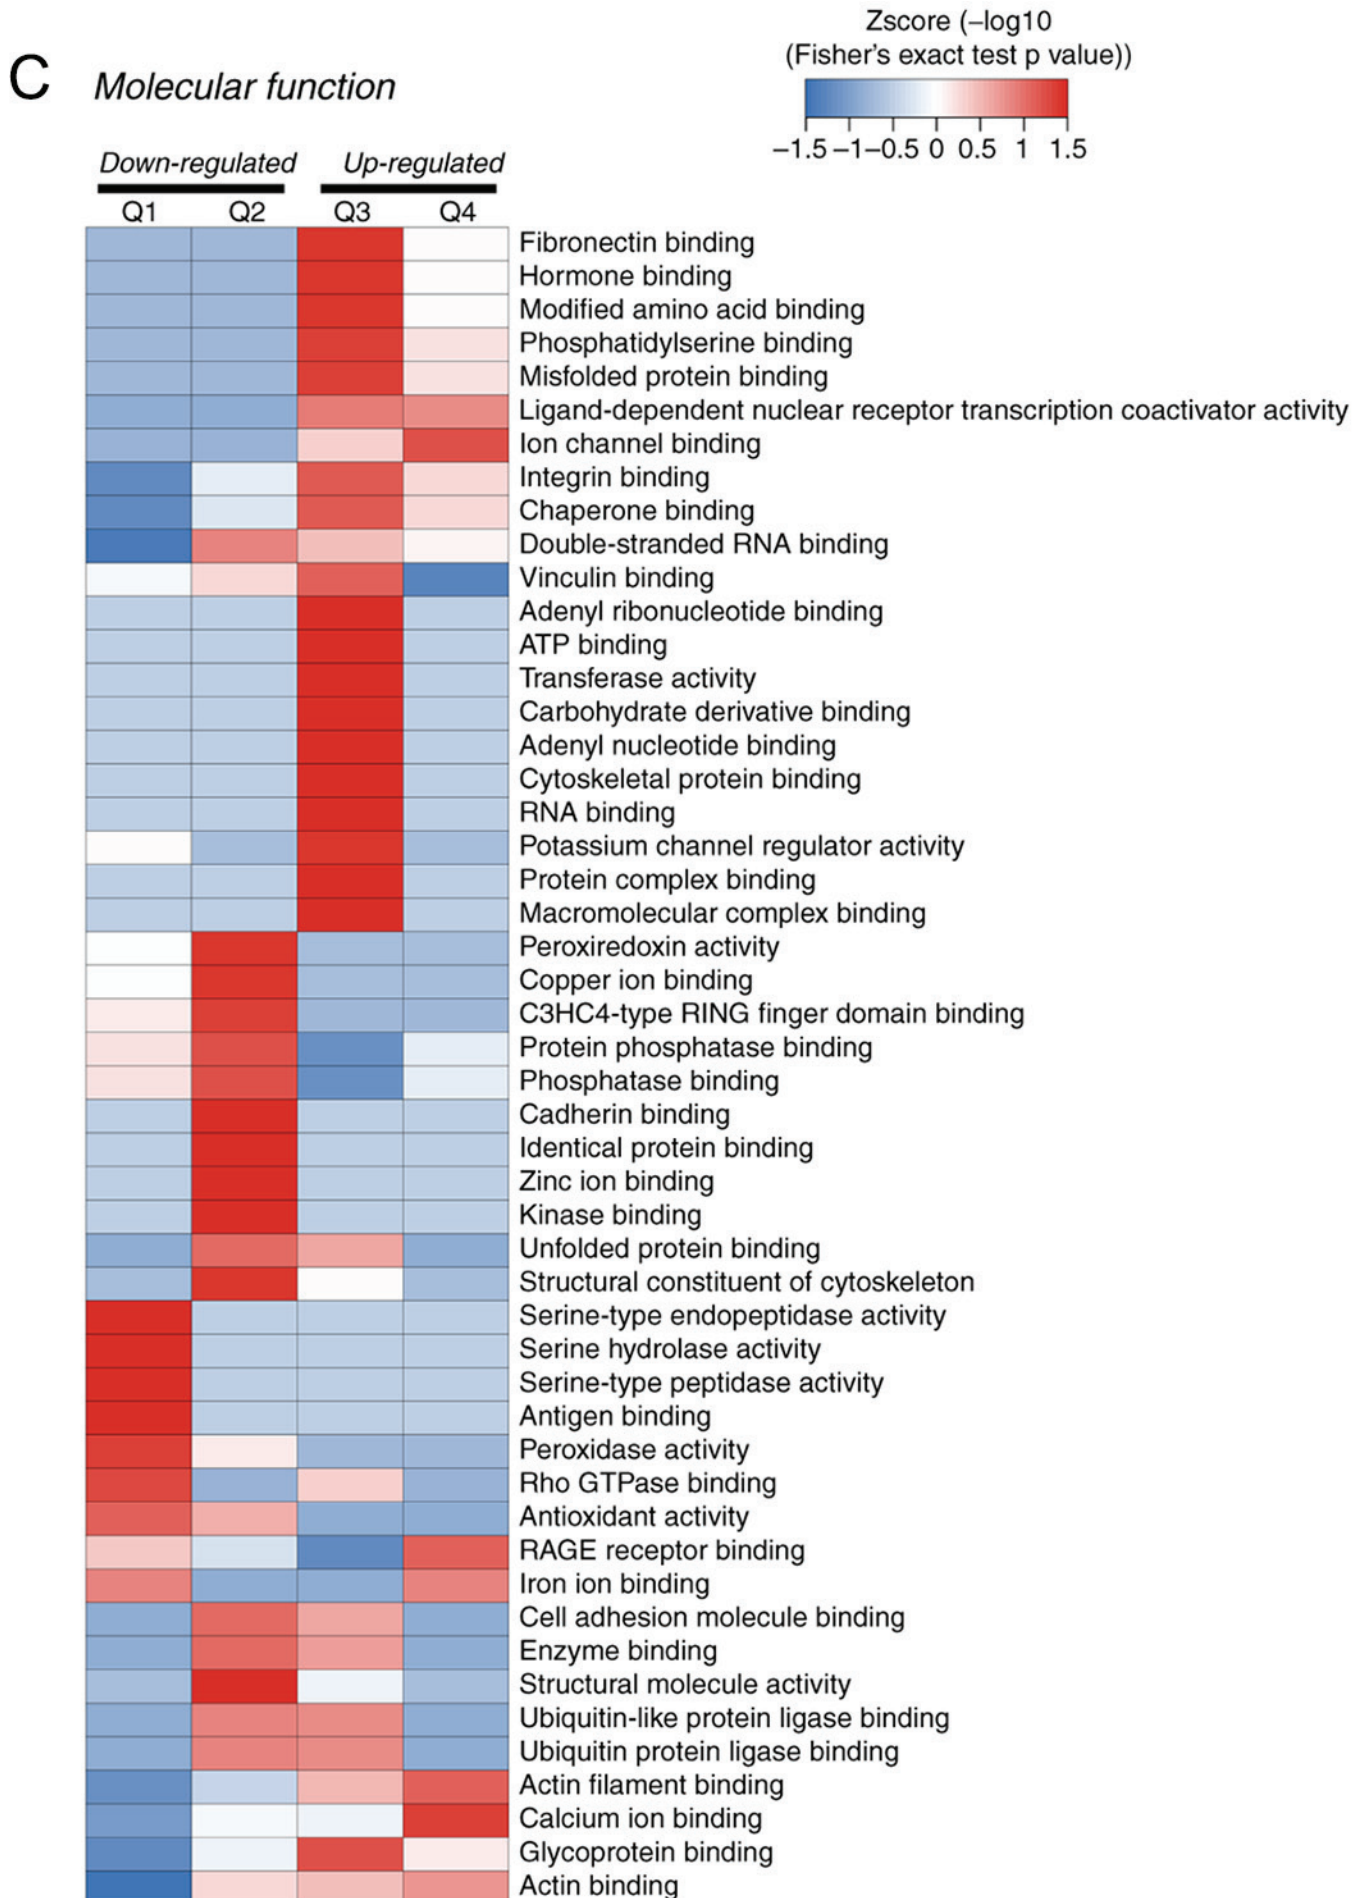

Figure S1. Continued. (D) KEGG analysis of crotonylated proteins.

**D** KEGG pathway

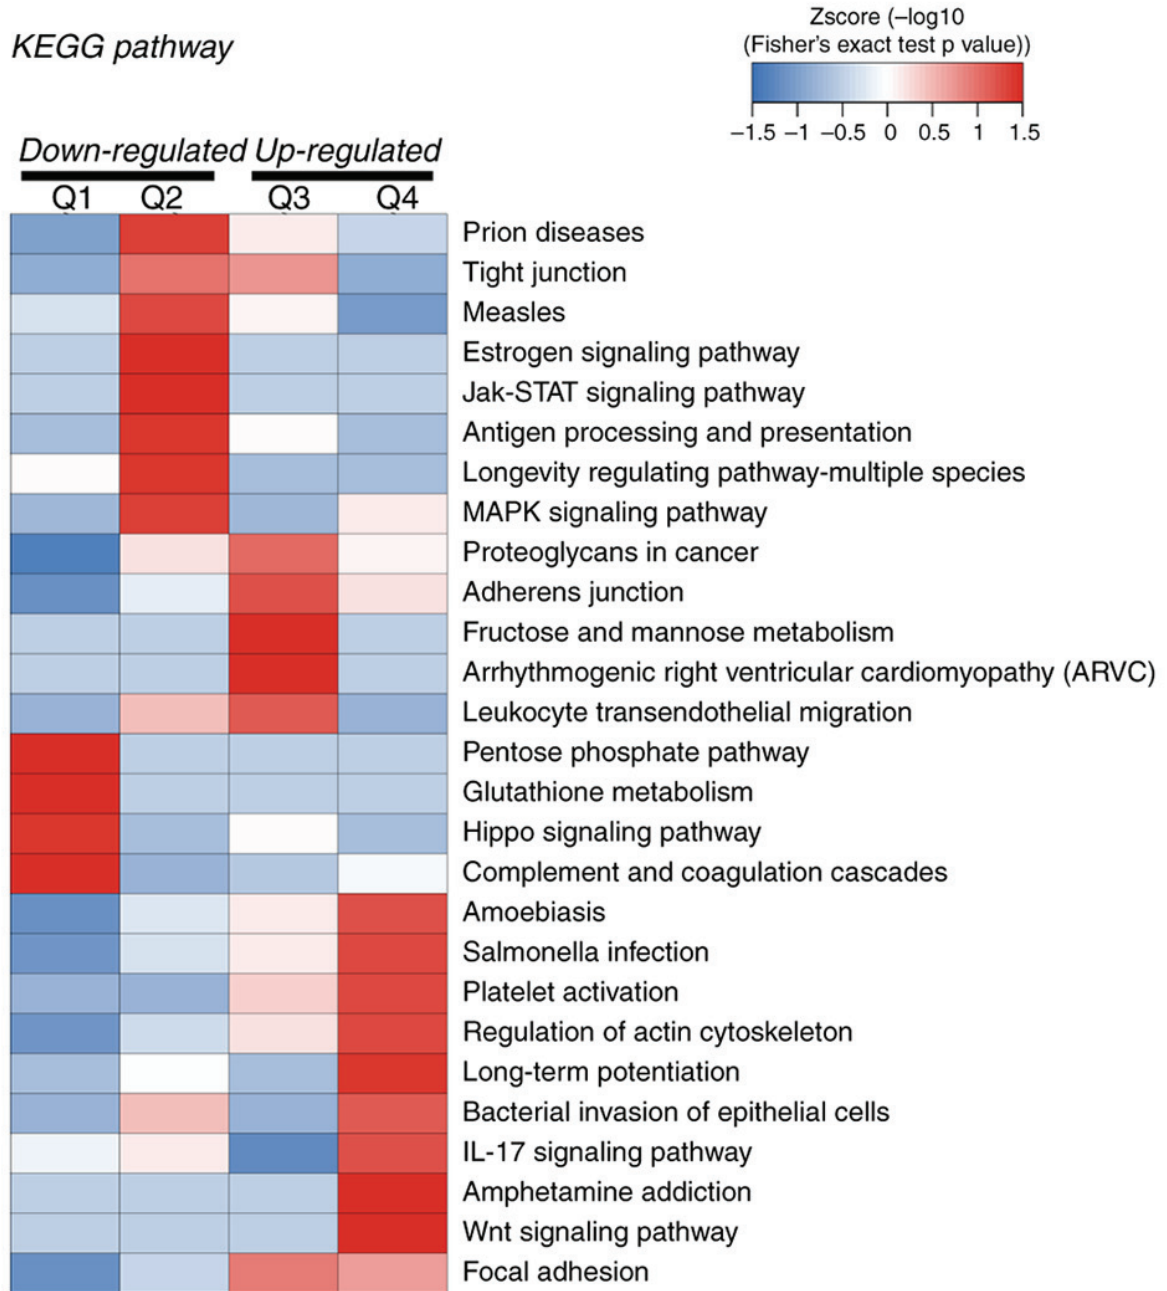

Figure S1. Continued. (E) Protein domain analysis of crotonylated proteins. A corrected  $P < 0.05$  was considered to indicate a significant difference. GO, Gene Ontology; KEGG, Kyoto Encyclopedia of Genes and Genomes.

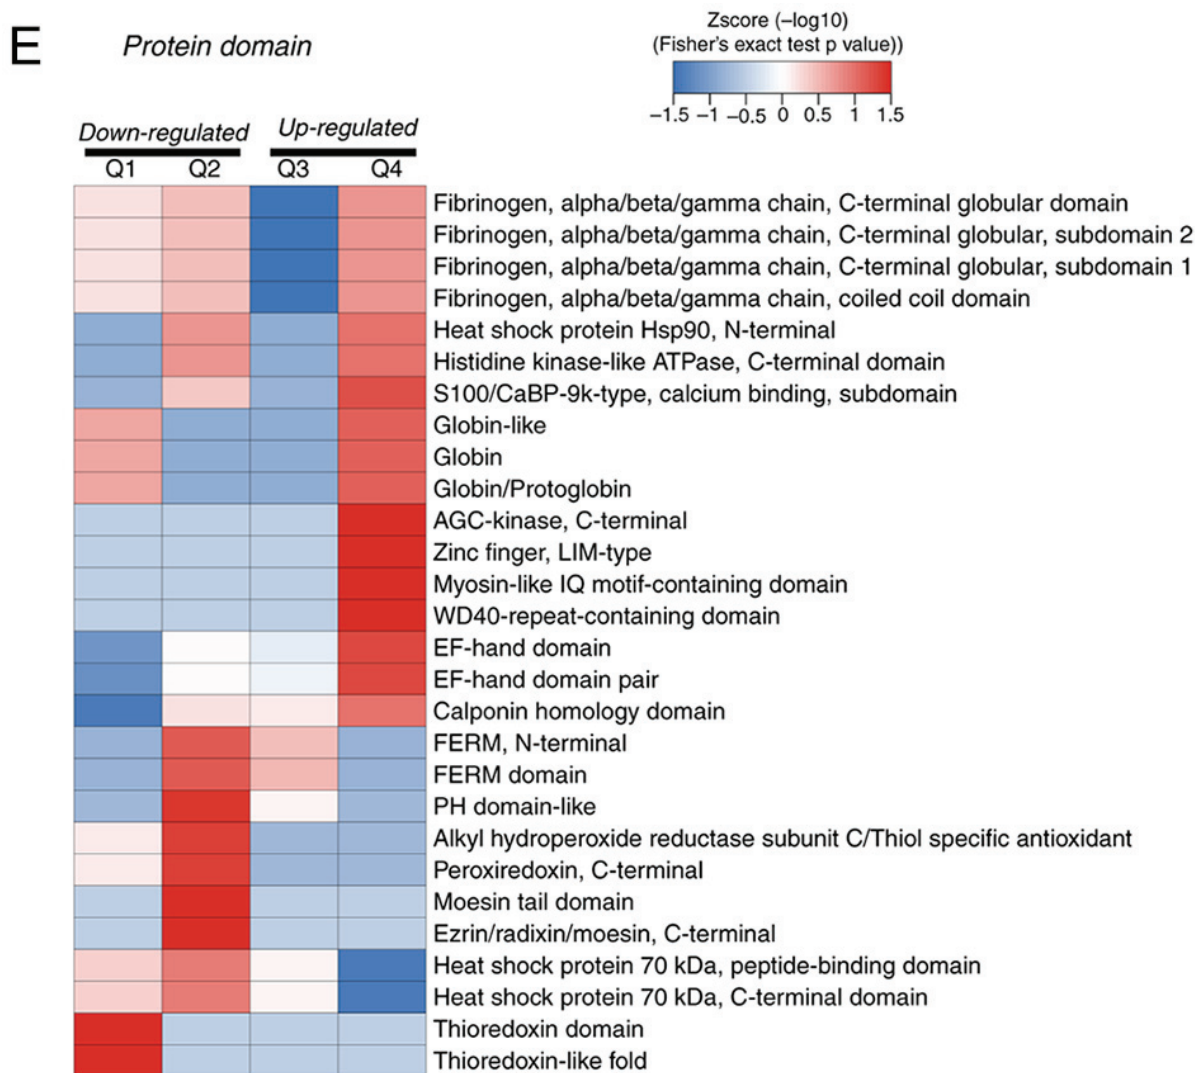

Table SI. Detailed information for all identified crotonylated peptides and their corresponding proteins between the immunoglobulin A nephropathy and negative control groups.

| Modified sequence                  | Gene name | IgA/NC ratio | Regulated type | Quant category |
|------------------------------------|-----------|--------------|----------------|----------------|
| LVGGK(1)DFEQPLAISR                 | PDLIM1    | 4.311317143  | Up             | Q4             |
| SQLDINNK(1)K                       | DNM1L     | 1.262721385  | Up             | Q3             |
| SVAK(1)LQDER                       | PSMA7     | 0.588993584  | Down           | Q1             |
| EK(1)EENEK                         | PSMA7     | 1.400454743  | Up             | Q4             |
| VTTSITSK(1)K                       | FYB       | 0.444088034  | Down           | Q1             |
| LDVPK(1)QSSQR                      | ARPC1B    | 1.603570432  | Up             | Q4             |
| WTK(1)VHELK                        | ARPC1B    | 1.315239535  | Up             | Q4             |
| ARPDAAEK(1)K                       | ARPC2     | 1.82556619   | Up             | Q4             |
| VFMQEFK(1)EGR                      | ARPC2     | 0.754072705  | Down           | Q1             |
| DDETMVYESK(1)K                     | ARPC2     | 0.777036538  | Down           | Q2             |
| ANVFFK(1)NYEIK                     | ARPC3     | 2.226826574  | Up             | Q4             |
| SQAVK(1)DR                         | ARPC5     | 1.330852389  | Up             | Q4             |
| WEK(1)VQQLVPK                      | ACTN4     | 0.715649192  | Down           | Q1             |
| EAMLK(1)HR                         | ACTN4     | 1.274870048  | Up             | Q3             |
| HRPELIEYDK(1)LR                    | ACTN4     | 1.949406668  | Up             | Q4             |
| VHK(1)INNVNK                       | ACTN4     | 1.277700108  | Up             | Q3             |
| ALDFIASK(1)GVK                     | ACTN4     | 0.544351459  | Down           | Q1             |
| NLDQMK(1)K                         | DIAPH1    | 0.561255312  | Down           | Q1             |
| LHDEK(1)EETAGSYDSR                 | DIAPH1    | 1.870512977  | Up             | Q4             |
| DVQNFPAAATDEK(0.75)DK(0.25)FVEK    | DIAPH1    | 0.442160268  | Down           | Q1             |
| YAPSGFYIASGDVSGK(1)LR              | WDR1      | 2.511772356  | Up             | Q4             |
| FK(1)FTIGDHSR                      | WDR1      | 1.332631919  | Up             | Q4             |
| DEGK(1)LLEAK                       | WDR1      | 1.483339243  | Up             | Q4             |
| LYSILGTTLK(1)DEGK                  | WDR1      | 0.647862409  | Down           | Q1             |
| VIQQSLEQEEAEHK(1)ATK               | ROCK2     | 1.262660033  | Up             | Q3             |
| HK(1)QELTEK                        | ROCK2     | 0.640004996  | Down           | Q1             |
| HK(0.023)QELTEK(0.977)DATIASLEETNR | ROCK2     | 1.489627264  | Up             | Q4             |
| KADHEADK(1)K                       | ROCK2     | 0.750297288  | Down           | Q1             |
| EK(1)VMYEK                         | TBCA      | 1.5567326    | Up             | Q4             |
| DVSDEK(1)LR                        | CS        | 0.795317221  | Down           | Q2             |
| DK(1)ITQYEK                        | EIF3J     | 0.434996967  | Down           | Q1             |
| VEEFK(1)LK                         | IDH1      | 0.62632901   | Down           | Q1             |
| AEAEQMAK(1)K                       | FLOT1     | 0.698800715  | Down           | Q1             |
| EK(1)ELEAR                         | FLOT1     | 0.664777502  | Down           | Q1             |
| VVEK(1)EAETER                      | ERLIN2    | 0.591064405  | Down           | Q1             |
| SIVEK(1)IQAK                       | RTN3      | 0.626793931  | Down           | Q1             |
| ANHPMDAETVK(1)AK                   | AP2A1     | 1.50872093   | Up             | Q4             |
| MVCANK(1)EEK                       | GSR       | 1.240864637  | Up             | Q3             |
| TLVVHEK(1)ADDLGK                   | SOD1      | 0.595042312  | Down           | Q1             |
| HGGPK(1)DEER                       | SOD1      | 0.805661092  | Down           | Q2             |
| ADDLGK(1)GGNEESTK                  | SOD1      | 0.344150386  | Down           | Q1             |
| QIGGDGMMDITDTYK(1)FQEGQEEER        | F13A1     | 2.829307649  | Up             | Q4             |
| KPLNTEGVMK(1)SR                    | F13A1     | 0.526167198  | Down           | Q1             |
| ETFVDVTLPLSFK(1)K                  | F13A1     | 0.723814515  | Down           | Q1             |
| DVLAK(1)QK                         | F13A1     | 0.619428953  | Down           | Q1             |
| LALETALMYGAK(1)K                   | F13A1     | 1.295497262  | Up             | Q3             |
| FHVEEGK(1)GK                       | PGK1      | 0.549453012  | Down           | Q1             |
| ITLPVDFVTADK(1)FDENAK              | PGK1      | 0.452844346  | Down           | Q1             |
| IVK(1)DLMSK                        | PGK1      | 0.519819209  | Down           | Q1             |
| AGGFLMK(1)K                        | PGK1      | 1.340581138  | Up             | Q4             |
| VK(1)AEPK                          | PGK1      | 0.770426939  | Down           | Q2             |
| ILGGHLDK(1)GSFPWQAK                | HP        | 0.7512933    | Down           | Q1             |
| QWINK(1)AVGDK                      | HP        | 1.370500954  | Up             | Q4             |
| TEGDGVYTLNDK(1)K                   | HP        | 0.622230534  | Down           | Q1             |
| HYEGSTVPEK(1)K                     | HP        | 0.490232331  | Down           | Q1             |
| QK(1)VSVNER                        | HP        | 0.533630292  | Down           | Q1             |
| SVLK(1)GGPFSDSYR                   | CA1       | 0.537348753  | Down           | Q1             |
| DFPIAK(1)GER                       | CA2       | 0.792013917  | Down           | Q2             |

Table SI. Continued. Detailed information for all identified crotonylated peptides and their corresponding proteins between the immunoglobulin A nephropathy and negative control groups.

| Modified sequence           | Gene name | IgA/NC ratio | Regulated type | Quant category |
|-----------------------------|-----------|--------------|----------------|----------------|
| GK(1)SADFTNFDPR             | CA2       | 0.729146912  | Down           | Q1             |
| FLEDVK(1)K                  | SERPINA1  | 1.587807256  | Up             | Q4             |
| AVHK(1)AVLTIDEK             | SERPINA1  | 0.762240676  | Down           | Q1             |
| GK(1)WERPFEVK               | SERPINA1  | 1.660453165  | Up             | Q4             |
| GTQGK(1)IVDLVK              | SERPINA1  | 2.038841003  | Up             | Q4             |
| SLNEEAVK(1)K                | A2M       | 0.473348427  | Down           | Q1             |
| AHEAK(1)IR                  | C3        | 0.588109313  | Down           | Q1             |
| SDDK(1)VTLEER               | C3        | 0.652043637  | Down           | Q1             |
| EAK(1)VQWK                  | IGKC      | 0.312247905  | Down           | Q1             |
| ADYEK(1)HK                  | IGKC      | 0.378142909  | Down           | Q1             |
| VQWK(1)VDNALQSGNSQESVTEQDSK | IGKC      | 0.333799837  | Down           | Q1             |
| PK(1)DTLMISR                | IGHG1     | 0.647264501  | Down           | Q1             |
| ALPAPIEK(1)TISK             | IGHG1     | 0.586739176  | Down           | Q1             |
| VEPK(1)SCDK                 | IGHG1     | 0.693619397  | Down           | Q1             |
| GLPAPIEK(1)TISK             | IGHG2     | 0.600908477  | Down           | Q1             |
| GFSPK(1)DVLVR               | IGHA2     | 0.514324619  | Down           | Q1             |
| VAAEDWK(1)K                 | IGHA2     | 0.565355568  | Down           | Q1             |
| FFESFGDLSSPDVAVMGNPK(1)VK   | HBD       | 1.437429268  | Up             | Q4             |
| TAVNALWGK(1)VNVDVAVGGEALGR  | HBD       | 0.276299412  | Down           | Q1             |
| GTFSQLSELHCDK(1)LHVDPENFR   | HBD       | 0.732679932  | Down           | Q1             |
| NFGK(1)EFTPQMQAAYQK         | HBD       | 0.678729466  | Down           | Q1             |
| EQELQK(1)EEAR               | SPTA1     | 0.739999013  | Down           | Q1             |
| LTHK(1)EFR                  | SPTA1     | 0.52285358   | Down           | Q1             |
| DLASAGNLLK(1)K              | SPTA1     | 0.410867169  | Down           | Q1             |
| QEMSK(1)DLEEVK              | APOA1     | 0.633502154  | Down           | Q1             |
| K(1)WQEEMELYSR              | APOA1     | 0.53383562   | Down           | Q1             |
| AK(1)VQPYLDDFQK             | APOA1     | 0.418443446  | Down           | Q1             |
| QK(1)VEPLR                  | APOA1     | 0.433440635  | Down           | Q1             |
| QK(1)LHELQEK                | APOA1     | 0.313458353  | Down           | Q1             |
| VK(1)SPELQAEAK              | APOA2     | 1.973500912  | Up             | Q4             |
| DLMEK(1)VK                  | APOA2     | 1.336361193  | Up             | Q4             |
| TVIGPDGHK(1)EVTK            | FGA       | 0.720048077  | Down           | Q1             |
| LVTSK(1)GDK                 | FGA       | 0.544135864  | Down           | Q1             |
| QLEQVIK(1)DLLPSR            | FGA       | 0.535540409  | Down           | Q1             |
| MK(1)GLIDEVNVQDFTR          | FGA       | 0.496438746  | Down           | Q1             |
| AQLVDMK(1)R                 | FGA       | 0.567148321  | Down           | Q1             |
| SQLQK(1)VPPEWK              | FGA       | 1.204080323  | Up             | Q3             |
| EK(1)VTSGSTTTTR             | FGA       | 0.234121591  | Down           | Q1             |
| EYHTEK(1)LVTSK              | FGA       | 0.800679167  | Down           | Q2             |
| LK(1)NSLFEYQK               | FGA       | 0.339582968  | Down           | Q1             |
| VQHIQLLQK(1)NVR             | FGA       | 1.837028736  | Up             | Q4             |
| EVDLK(1)DYEDQK              | FGA       | 0.482106685  | Down           | Q1             |
| QVK(1)DNENVVNEYSSSELEK      | FGB       | 0.705221861  | Down           | Q1             |
| AAATQK(1)K                  | FGB       | 0.40706936   | Down           | Q1             |
| TPCTVSCNIPVVSQK(1)ECEIIR    | FGB       | 1.988544474  | Up             | Q4             |
| GHRPLDK(1)K                 | FGB       | 0.60163817   | Down           | Q1             |
| TSEVK(1)QLIK                | FGG       | 0.418726245  | Down           | Q1             |
| DCQDIANK(1)GAK              | FGG       | 0.417383852  | Down           | Q1             |
| YLQEIYNSNNQK(1)IVNLK        | FGG       | 0.659955845  | Down           | Q1             |
| K(1)MLEEIMK                 | FGG       | 0.305111022  | Down           | Q1             |
| EK(1)VAQLEAQCQEPCK          | FGG       | 1.809364142  | Up             | Q4             |
| RLDGSVDFK(1)K               | FGG       | 0.51967062   | Down           | Q1             |
| VAQLEAQCQEPCK(1)DTVQIHDITGK | FGG       | 15.06672651  | Up             | Q4             |
| TSTADYAMFK(1)VGPEADK        | FGG       | 0.693870336  | Down           | Q1             |
| IVNLK(1)EK                  | FGG       | 0.402785537  | Down           | Q1             |
| K(1)NWIQYK                  | FGG       | 0.788297358  | Down           | Q2             |
| GTHCNQVEVIATLK(1)DGR        | PPBP      | 2.846224666  | Up             | Q4             |
| K(1)LAGDESAD                | PPBP      | 3.591758182  | Up             | Q4             |

Table SI. Continued. Detailed information for all identified crotonylated peptides and their corresponding proteins between the immunoglobulin A nephropathy and negative control groups.

| Modified sequence                               | Gene name | IgA/NC ratio | Regulated type | Quant category |
|-------------------------------------------------|-----------|--------------|----------------|----------------|
| GK(1)EESLSDSLYAELR                              | PPBP      | 5.114949768  | Up             | Q4             |
| DK(1)EACVHK                                     | TF        | 0.580298109  | Down           | Q1             |
| FQLFGSPSGQK(1)DLLFK                             | LTF       | 1.799950001  | Up             | Q4             |
| YLG PQYVAGITNLK(1)K                             | LTF       | 0.415958143  | Down           | Q1             |
| FFSASCVPGADK(1)GQFPNLCR                         | LTF       | 0.69620251   | Down           | Q1             |
| THYYAVAVVK(1)K                                  | LTF       | 0.435313736  | Down           | Q1             |
| FK(1)DCHLAR                                     | LTF       | 0.479000117  | Down           | Q1             |
| FHYK(1)TDQGIK                                   | CAT       | 0.428094627  | Down           | Q1             |
| VWPHK(1)DYPLIPVGK                               | CAT       | 0.444265611  | Down           | Q1             |
| AK(1)VFEHIGK                                    | CAT       | 0.564810338  | Down           | Q1             |
| DAQIFIQK(1)K                                    | CAT       | 0.510918551  | Down           | Q1             |
| DPASDQM QHWK(1)EQR                              | CAT       | 0.649337377  | Down           | Q1             |
| VFEHIGK(1)K                                     | CAT       | 0.474620055  | Down           | Q1             |
| AAQEEYVK(1)R                                    | ALDOA     | 1.207591846  | Up             | Q3             |
| SK(1)GGVVGIK                                    | ALDOA     | 0.341735931  | Down           | Q1             |
| K(1)ELSDIAHR                                    | ALDOA     | 1.263874043  | Up             | Q3             |
| DLAK(1)DITSDTSGDFR                              | ANXA1     | 0.474923505  | Down           | Q1             |
| NALLSLAK(1)GDR                                  | ANXA1     | 0.498114231  | Down           | Q1             |
| GVDEATIIDILTK(1)R                               | ANXA1     | 0.624117564  | Down           | Q1             |
| HDMNK(1)VLDLELK                                 | ANXA1     | 0.539171622  | Down           | Q1             |
| SQAIATK(1)K                                     | POB       | 0.610798284  | Down           | Q1             |
| VVDLMAHMASK(1)E                                 | GAPDH     | 1.209645618  | Up             | Q3             |
| LEK(0.007)PAK(0.993)YDDIK                       | GAPDH     | 1.299166517  | Up             | Q3             |
| AGAHLQGGAK(1)R                                  | GAPDH     | 1.499106912  | Up             | Q4             |
| AFK(1)SLDK                                      | CAPNS1    | 1.213715984  | Up             | Q3             |
| WQAIYK(1)QFDTR                                  | CAPNS1    | 1.281069991  | Up             | Q3             |
| TK(1)DGVVEITGK                                  | HSPB1     | 1.726641928  | Up             | Q4             |
| VVTHPFK(1)TIELQMK                               | CYBB      | 0.54381325   | Down           | Q1             |
| GCPQEK(1)EK                                     | ITGB3     | 1.25926619   | Up             | Q3             |
| EFAK(1)FEEER                                    | ITGB3     | 2.315001367  | Up             | Q4             |
| EK(1)SFTIKPVGFK                                 | ITGB3     | 4.196124222  | Up             | Q4             |
| ELK(1)DTGK                                      | ITGB3     | 1.609483177  | Up             | Q4             |
| CPTCPDCTFK(1)K                                  | ITGB3     | 8.354947197  | Up             | Q4             |
| SK(1)VELEVR                                     | ITGB3     | 0.690413248  | Down           | Q1             |
| MGVAHK(1)K                                      | S100A8    | 1.477704362  | Up             | Q4             |
| SHEESHK(1)E                                     | S100A8    | 3.236673144  | Up             | Q4             |
| K(1)SHEESHKE                                    | S100A8    | 7.175999636  | Up             | Q4             |
| K(1)LLETCPQYIR                                  | S100A8    | 0.701237345  | Down           | Q1             |
| K(1)GADVWFK                                     | S100A8    | 0.747518187  | Down           | Q1             |
| YSLIK(1)GNFHAVYR                                | S100A8    | 0.369723591  | Down           | Q1             |
| GLMATPAK(1)LNR                                  | MPO       | 0.719195414  | Down           | Q1             |
| FQLK(0.999)ESDK(0.001)DR                        | PRKCB     | 1.805960492  | Up             | Q4             |
| LGHPTLNQGEFK(1)ELVR                             | S100A9    | 0.255568732  | Down           | Q1             |
| LTWASHEK(0.999)MHEGDEGPGHHHK<br>(0.001)PGLGEGTP | S100A9    | 1.788306973  | Up             | Q4             |
| NEK(1)VIEHIMEDLDTNADK                           | S100A9    | 0.769811268  | Down           | Q2             |
| K(1)DLQNFLK                                     | S100A9    | 2.697254572  | Up             | Q4             |
| KENK(1)NEK                                      | S100A9    | 2.249769335  | Up             | Q4             |
| EGDKHTLSK(1)K                                   | S100A6    | 0.817904997  | Down           | Q2             |
| ELTIGSK(1)LQDAEIAR                              | S100A6    | 0.804361573  | Down           | Q2             |
| TIAPALVSK(1)K                                   | ENO1      | 0.616614796  | Down           | Q1             |
| AGAVEK(1)GVPLYR                                 | ENO1      | 0.82643485   | Down           | Q2             |
| DATNVGDEGGFAPNILENK(1)EGLELLK                   | ENO1      | 0.546630295  | Down           | Q1             |
| EGLELLK(1)TAIGK                                 | ENO1      | 1.570654515  | Up             | Q4             |
| GVS(1)AVEHINK                                   | ENO1      | 0.509239617  | Down           | Q1             |
| IDK(1)LMIEMDGTENK                               | ENO1      | 0.567842352  | Down           | Q1             |
| K(1)LNVTEQEK                                    | ENO1      | 0.723155516  | Down           | Q1             |
| YMGK(1)GVSK                                     | ENO1      | 0.607337377  | Down           | Q1             |

Table SI. Continued. Detailed information for all identified crotonylated peptides and their corresponding proteins between the immunoglobulin A nephropathy and negative control groups.

| Modified sequence           | Gene name | IgA/NC ratio | Regulated type | Quant category |
|-----------------------------|-----------|--------------|----------------|----------------|
| LMIEMDGTENK(1)SK            | ENO1      | 0.489939123  | Down           | Q1             |
| AVNEK(1)SCNCLLLK            | ENO1      | 0.749854191  | Down           | Q1             |
| IVALFPK(1)DVDR              | PYGL      | 0.588792763  | Down           | Q1             |
| IDDVAALDK(1)K               | PYGL      | 0.804360968  | Down           | Q2             |
| VLYPNDNFFEGK(1)ELR          | PYGL      | 0.62125953   | Down           | Q1             |
| DVMPEVNK(1)VLDK             | GPI       | 0.669691791  | Down           | Q1             |
| EWFLQAAK(1)DPSAVAK          | GPI       | 0.609625936  | Down           | Q1             |
| MLVDLAK(1)SR                | GPI       | 0.807204411  | Down           | Q2             |
| ELQAAGK(1)SPEDLER           | GPI       | 1.374073131  | Up             | Q4             |
| ALK(1)DEEK                  | TPM3      | 2.0897343    | Up             | Q4             |
| EDK(1)YEEIHK                | TPM3      | 3.966031746  | Up             | Q4             |
| ILTDK(1)LK                  | TPM3      | 2.704022989  | Up             | Q4             |
| YSQK(0.986)EDK(0.014)YEEIHK | TPM3      | 2.943768997  | Up             | Q4             |
| MELQEIQLK(1)EAK             | TPM3      | 2.411743516  | Up             | Q4             |
| EAK(1)HIAEEADR              | TPM3      | 1.451420455  | Up             | Q4             |
| LSNFK(1)TAAESFK             | P4HB      | 0.622581154  | Down           | Q1             |
| NFEDVAFDEK(1)K              | P4HB      | 0.758800024  | Down           | Q1             |
| TAAESFK(1)GK                | P4HB      | 1.324872411  | Up             | Q4             |
| LK(1)AEGSEIR                | P4HB      | 0.752550556  | Down           | Q1             |
| EMYK(1)TDLEK                | ANXA2     | 1.843047521  | Up             | Q4             |
| MSMK(1)EVDEQMLNVQNK         | TUBB      | 0.757825371  | Down           | Q1             |
| TDK(1)TLVLLMGK              | PFN1      | 0.50322546   | Down           | Q1             |
| STGGAPTFNVTVT(1)TDK         | PFN1      | 0.742136771  | Down           | Q1             |
| TFVNITPAEVGVLV(1)DR         | PFN1      | 0.525392282  | Down           | Q1             |
| EGVHGGLINK(1)K              | PFN1      | 0.520504732  | Down           | Q1             |
| ELHINLIPNK(1)QDR            | HSP90AA1  | 3.918013445  | Up             | Q4             |
| QK(1)AEADK                  | HSP90AA1  | 1.434534921  | Up             | Q4             |
| EMLQQSK(1)ILK               | HSP90AA1  | 0.798443264  | Down           | Q2             |
| VILHLK(1)EDQTEYLEER         | HSP90AA1  | 1.746504374  | Up             | Q4             |
| HIYYITGETK(1)DQVANSFAVER    | HSP90AA1  | 2.079514644  | Up             | Q4             |
| AEADK(1)NDK                 | HSP90AA1  | 2.145225359  | Up             | Q4             |
| LHDALDAK(1)SK               | FH        | 0.731712049  | Down           | Q1             |
| LSHRPK(1)TGFIR              | THBS1     | 1.200165322  | Up             | Q3             |
| TNYIGHK(1)TK                | THBS1     | 1.49065653   | Up             | Q4             |
| GAGTDEK(1)TLTR              | ANXA6     | 0.699572284  | Down           | Q1             |
| NDTSGEYK(1)K                | ANXA6     | 0.522294945  | Down           | Q1             |
| LDSGK(1)ELK                 | HSP90AB1  | 0.63845924   | Down           | Q1             |
| AEADK(1)NDK                 | HSP90AB1  | 1.787675456  | Up             | Q4             |
| MEESK(1)AK                  | HSP90AB1  | 1.980770455  | Up             | Q4             |
| NVGSQTLQTFK(1)AR            | ITGA2B    | 0.524466159  | Down           | Q1             |
| TEEAEK(1)TPVGCFLAQPEGR      | ITGA2B    | 3.308787736  | Up             | Q4             |
| K(1)SDNSPK                  | PLEK      | 0.228185473  | Down           | Q1             |
| ITTTK(1)QQDHFFQAAFLEER      | PLEK      | 0.593626286  | Down           | Q1             |
| GSTLTSPCQDFGK(1)R           | PLEK      | 0.610199331  | Down           | Q1             |
| K(1)GSVFNTWK                | PLEK      | 0.402789133  | Down           | Q1             |
| AIK(1)CIEGGQK               | PLEK      | 0.513352365  | Down           | Q1             |
| EGYLVK(1)K                  | PLEK      | 0.80475335   | Down           | Q2             |
| TQHIGNQEENK(1)SK            | PTPRC     | 1.793991899  | Up             | Q4             |
| QVDQLTNDK(1)AR              | VIM       | 0.826711601  | Down           | Q2             |
| GDTSGDYK(1)K                | ANXA5     | 0.785565719  | Down           | Q2             |
| GAGTNEK(1)VLTEIIASR         | ANXA5     | 1.422394245  | Up             | Q4             |
| EAK(1)HIAEDADR              | TPM1      | 4.653068496  | Up             | Q4             |
| AQK(1)DEEK                  | TPM1      | 3.478531447  | Up             | Q4             |
| SESPK(1)EPEQLR              | HNRNPA1   | 0.799107821  | Down           | Q2             |
| TLVWSEK(1)EQVEK             | LTA4H     | 0.437409911  | Down           | Q1             |
| SLVLDTK(1)DLTIEK            | LTA4H     | 0.625065529  | Down           | Q1             |
| LSK(1)EEIER                 | HSPA1B    | 0.512359388  | Down           | Q1             |
| LDK(1)AQIHDLVLVGGSTR        | HSPA1B    | 0.828705531  | Down           | Q2             |

Table SI. Continued. Detailed information for all identified crotonylated peptides and their corresponding proteins between the immunoglobulin A nephropathy and negative control groups.

| Modified sequence         | Gene name | IgA/NC ratio | Regulated type | Quant category |
|---------------------------|-----------|--------------|----------------|----------------|
| VQVSYK(1)GETK             | HSPA1B    | 0.729106866  | Down           | Q1             |
| YK(1)AEDEVQR              | HSPA1B    | 0.474947066  | Down           | Q1             |
| ANK(1)ITITNDK             | HSPA1B    | 0.678657074  | Down           | Q1             |
| ITITNDK(1)GR              | HSPA1B    | 0.448008589  | Down           | Q1             |
| QIESK(1)TAFQEALDAAGDK     | TXN       | 0.643297203  | Down           | Q1             |
| VK(1)QIESK                | TXN       | 0.588903041  | Down           | Q1             |
| VGEFSGANK(1)EK            | TXN       | 0.623527239  | Down           | Q1             |
| VTK(1)DGVTVAK             | HSPD1     | 1.358206649  | Up             | Q4             |
| VGGTSDVEVNEK(1)K          | HSPD1     | 1.2511372    | Up             | Q3             |
| FAEDK(1)K                 | HSPA5     | 0.802948208  | Down           | Q2             |
| FLPFK(1)VVEK              | HSPA5     | 0.431768221  | Down           | Q1             |
| NK(1)ITITNDQNR            | HSPA5     | 0.751106053  | Down           | Q1             |
| NQIGDK(1)EK               | HSPA5     | 0.781735107  | Down           | Q2             |
| ETAAYLGK(1)K              | HSPA5     | 0.737540782  | Down           | Q1             |
| MK(1)ETAAYLGK             | HSPA5     | 1.23542489   | Up             | Q3             |
| VLESDLK(1)K               | HSPA5     | 1.64801444   | Up             | Q4             |
| LDK(1)SQIHDIIVLVGGSTR     | HSPA8     | 2.166611376  | Up             | Q4             |
| PK(1)VQVEYK               | HSPA8     | 0.629647614  | Down           | Q1             |
| YK(1)AEDEK                | HSPA8     | 0.494548564  | Down           | Q1             |
| DISENK(1)R                | HSPA8     | 0.556700688  | Down           | Q1             |
| MK(1)EIAEAYLGK            | HSPA8     | 0.815429076  | Down           | Q2             |
| MVNHFAEFK(1)R             | HSPA8     | 0.477577192  | Down           | Q1             |
| QATK(1)DAGTIAGLNVLR       | HSPA8     | 1.735416987  | Up             | Q4             |
| LSK(1)EDIER               | HSPA8     | 0.400601797  | Down           | Q1             |
| VQVEYK(1)GETK             | HSPA8     | 0.544049035  | Down           | Q1             |
| AEDEK(1)QR                | HSPA8     | 1.246198222  | Up             | Q3             |
| AMTK(1)DNLLGK             | HSPA8     | 0.413182005  | Down           | Q1             |
| ITITNDK(1)GR              | HSPA8     | 0.784056936  | Down           | Q2             |
| IINEPTAAAIAYGLDK(1)K      | HSPA8     | 0.791044382  | Down           | Q2             |
| LWGTQDVSQDIQEMK(1)DESAR   | SLC2A3    | 2.360884024  | Up             | Q4             |
| KEENAK(1)QILQR            | SLC2A3    | 2.527306803  | Up             | Q4             |
| EK(1)VQLIEDR              | SPTB      | 0.400742691  | Down           | Q1             |
| QSEPFK(1)ATPEEK           | G6PD      | 0.714038539  | Down           | Q1             |
| GPTEADELMK(1)R            | G6PD      | 0.674011264  | Down           | Q1             |
| GFSNLK(1)K                | MTHFD1    | 0.726653542  | Down           | Q1             |
| LAADVKG(1)SGTER           | SLC25A6   | 1.699213969  | Up             | Q4             |
| DEGGK(1)AFFK              | SLC25A6   | 0.713544725  | Down           | Q1             |
| ELK(1)DDLK                | ANXA3     | 0.4563023    | Down           | Q1             |
| RDESLK(1)VDEHLAK          | ANXA3     | 0.539773816  | Down           | Q1             |
| LDHLAEK(1)FR              | ACTN1     | 0.639480418  | Down           | Q1             |
| K(1)DDPLTNLNTAFDVAEK      | ACTN1     | 0.795576749  | Down           | Q2             |
| DAK(1)GISQEQMNEFR         | ACTN1     | 1.652515891  | Up             | Q4             |
| K(1)HEAFESDLAAHQDR        | ACTN1     | 1.519482728  | Up             | Q4             |
| ATLPDADK(1)ER             | ACTN1     | 1.223267833  | Up             | Q3             |
| ILAGDK(1)NYITMDELR        | ACTN1     | 1.236462456  | Up             | Q3             |
| ISNVNK(1)ALDFIASK         | ACTN1     | 0.476334003  | Down           | Q1             |
| ALDFIASK(1)GVK            | ACTN1     | 0.677230089  | Down           | Q1             |
| TLFPLIEAK(1)K             | XRCC5     | 0.385219821  | Down           | Q1             |
| VFDAIMNFK(1)K             | EEF2      | 0.691046573  | Down           | Q1             |
| SATSPEGK(1)K              | EEF2      | 0.722005194  | Down           | Q1             |
| EFVTAFAK(1)K              | PDIA4     | 1.776584564  | Up             | Q4             |
| K(1)WEAAHAAEQQR           | HLA-A     | 2.949260872  | Up             | Q4             |
| IGNFSTDIK(1)DSK           | LCP1      | 1.531080138  | Up             | Q4             |
| SSSISFK(1)DPK             | LCP1      | 1.288127806  | Up             | Q3             |
| STDVAK(1)TFR              | LCP1      | 0.588580879  | Down           | Q1             |
| TENLNDDEK(1)LNNAK         | LCP1      | 0.78949247   | Down           | Q2             |
| IFHGLK(1)STDVAK           | LCP1      | 1.350553333  | Up             | Q4             |
| TVK(0.999)EEAEK(0.001)PER | PRKCSH    | 1.999539734  | Up             | Q4             |

Table SI. Continued. Detailed information for all identified crotonylated peptides and their corresponding proteins between the immunoglobulin A nephropathy and negative control groups.

| Modified sequence            | Gene name | IgA/NC ratio | Regulated type | Quant category |
|------------------------------|-----------|--------------|----------------|----------------|
| NK(1)FEEAER                  | PRKCSH    | 2.269981239  | Up             | Q4             |
| VNFAMNVGK(1)AR               | PKM       | 1.839714715  | Up             | Q4             |
| VLGEK(1)GK                   | PKM       | 0.4728449    | Down           | Q1             |
| SVETLK(1)EMIK                | PKM       | 0.356067477  | Down           | Q1             |
| GSGTAEVELK(1)K               | PKM       | 0.750598004  | Down           | Q1             |
| IEK(1)AVVSQR                 | HSP90B1   | 1.604517023  | Up             | Q4             |
| NK(1)EIFLR                   | HSP90B1   | 0.764129489  | Down           | Q1             |
| FQNVAK(1)EGVK                | HSP90B1   | 0.808950856  | Down           | Q2             |
| GLFDEYGSK(1)K                | HSP90B1   | 1.235573538  | Up             | Q3             |
| EK(1)EELMLR                  | EZR       | 0.785195952  | Down           | Q2             |
| FVEDTK(1)K                   | CBR1      | 1.32644575   | Up             | Q4             |
| ALAAGGYDVEK(1)NNSR           | HIST1H1B  | 0.610877455  | Down           | Q1             |
| PSEK(1)IQVLK                 | CD36      | 1.965444392  | Up             | Q4             |
| DDMIPK(1)ESK                 | BPI       | 0.556418157  | Down           | Q1             |
| VNEK(1)LQK                   | BPI       | 0.463542097  | Down           | Q1             |
| NLPGMTK(1)MAK                | VCL       | 0.510326848  | Down           | Q1             |
| EVENSEDPK(1)FR               | VCL       | 1.247029374  | Up             | Q3             |
| K(1)IDAAQNWLADPNGGPEGEEQIR   | VCL       | 1.890214875  | Up             | Q4             |
| DTEAMK(1)R                   | VCL       | 0.807871422  | Down           | Q2             |
| LNQAK(1)GWLR                 | VCL       | 0.767056278  | Down           | Q1             |
| ILGAVAK(1)VR                 | VCL       | 0.740397181  | Down           | Q1             |
| NSK(1)NQGIEEALK              | VCL       | 0.712363067  | Down           | Q1             |
| ALIQCAK(1)DIAK               | VCL       | 0.768159745  | Down           | Q1             |
| LAK(1)EVAK                   | VCL       | 1.43065715   | Up             | Q4             |
| PAK(1)AAVHLEGK               | VCL       | 0.74687117   | Down           | Q1             |
| NQGIEEALK(1)NR               | VCL       | 1.320459318  | Up             | Q4             |
| AAAVGTANK(1)STVEGIQASVK      | VCL       | 1.207961502  | Up             | Q3             |
| VGELCAGK(1)ER                | VCL       | 0.624523573  | Down           | Q1             |
| ALASQLQDSLK(1)DLK            | VCL       | 0.67113023   | Down           | Q1             |
| EAVK(1)AASDELSK              | VCL       | 0.775255261  | Down           | Q2             |
| QDLLAK(1)CDR                 | VCL       | 0.831381958  | Down           | Q2             |
| IFVTTK(1)NSK                 | VCL       | 0.785437166  | Down           | Q2             |
| AAVHLEGK(1)IEQAQR            | VCL       | 1.545903058  | Up             | Q4             |
| ILLVAK(1)R                   | VCL       | 0.632866191  | Down           | Q1             |
| AETAAK(1)HGEAQVK             | PGAM1     | 0.25661986   | Down           | Q1             |
| HYGGLTGLNK(1)AETAAK          | PGAM1     | 0.560335785  | Down           | Q1             |
| EAPIDK(1)K                   | MYL12A    | 1.385142875  | Up             | Q4             |
| LVSK(1)DGK                   | NCL       | 0.708712002  | Down           | Q1             |
| TFEEK(1)QGTEIDGR             | NCL       | 0.800200007  | Down           | Q2             |
| MAK(1)EGLLFEGR               | HK1       | 1.21806844   | Up             | Q3             |
| DK(1)HLAVAYFQR               | NCF2      | 0.361815861  | Down           | Q1             |
| VSGLGEK(1)VDVGK              | FLNA      | 1.531755008  | Up             | Q4             |
| LDVQFSGGTK(1)GDAVR           | FLNA      | 0.667495591  | Down           | Q1             |
| VTVK(1)GPK                   | FLNA      | 0.688629333  | Down           | Q1             |
| VK(1)CSGPGLSPGMVR            | FLNA      | 0.730984288  | Down           | Q1             |
| VK(1)AEGPGLSR                | FLNA      | 0.784699368  | Down           | Q2             |
| ETGEHLVHVK(1)K               | FLNA      | 0.542344296  | Down           | Q1             |
| GK(1)LDVQFSGGTK              | FLNA      | 0.600004747  | Down           | Q1             |
| GQHVPGPSFQFTVGPLGEGGAHK(1)VR | FLNA      | 2.976596253  | Up             | Q4             |
| VDVGKDQEFTVK(1)SK            | FLNA      | 0.722504165  | Down           | Q1             |
| ETADFK(1)VYTK                | FLNA      | 0.824659893  | Down           | Q2             |
| VK(1)CSGPGLER                | FLNA      | 0.536645679  | Down           | Q1             |
| VGTECGNQK(1)VR               | FLNA      | 0.262487222  | Down           | Q1             |
| IECDDK(1)GDGSCDVR            | FLNA      | 0.185542157  | Down           | Q1             |
| VK(1)VYGPVAK                 | FLNA      | 1.539857942  | Up             | Q4             |
| ALTQTGGPHVK(1)AR             | FLNA      | 1.265944     | Up             | Q3             |
| VK(1)VEPSHDASK               | FLNA      | 1.378356209  | Up             | Q4             |
| VYTK(1)GAGSGELK              | FLNA      | 0.34015752   | Down           | Q1             |

Table SI. Continued. Detailed information for all identified crotonylated peptides and their corresponding proteins between the immunoglobulin A nephropathy and negative control groups.

| Modified sequence      | Gene name | IgA/NC ratio | Regulated type | Quant category |
|------------------------|-----------|--------------|----------------|----------------|
| FADQHVPSPFSVK(1)VTGEGR | FLNA      | 1.818056268  | Up             | Q4             |
| VVAK(1)GLGLSK          | FLNA      | 0.581294824  | Down           | Q1             |
| AK(1)VTGPR             | FLNA      | 0.661651592  | Down           | Q1             |
| HGGK(1)APLR            | FLNA      | 1.843441637  | Up             | Q4             |
| VAQPTITDNK(1)DGTVTVR   | FLNA      | 1.791662733  | Up             | Q4             |
| AHVVPDASK(1)VK         | FLNA      | 1.240251198  | Up             | Q3             |
| VPVHDVTDASK(1)VK       | FLNA      | 1.260767693  | Up             | Q3             |
| VEPSHDASK(1)VK         | FLNA      | 1.846638511  | Up             | Q4             |
| VK(1)ETADFK            | FLNA      | 0.641750582  | Down           | Q1             |
| VK(1)MDCQCEPEGYR       | FLNA      | 1.450903866  | Up             | Q4             |
| VYGPVAK(1)TGLK         | FLNA      | 1.290616902  | Up             | Q3             |
| GLQPK(1)GVR            | FLNA      | 0.177647048  | Down           | Q1             |
| DTYNK(1)LK             | CD9       | 0.830078759  | Down           | Q2             |
| TK(1)DEPQR             | CD9       | 0.451930818  | Down           | Q1             |
| EVQEFYK(1)DTYNK        | CD9       | 2.069811041  | Up             | Q4             |
| KLEEEGEQFVK(1)K        | SCP2      | 0.604408882  | Down           | Q1             |
| LK(1)SDTAAAVR          | UBA1      | 0.460485062  | Down           | Q1             |
| LVAMK(1)FLR            | NME2      | 1.270622178  | Up             | Q3             |
| LFVGGIK(1)EDTEEHHLR    | HNRNPA2B1 | 1.265091219  | Up             | Q3             |
| LK(1)QIEHTLNEK         | PRKACB    | 1.657300426  | Up             | Q4             |
| AK(1)EDFLK             | PRKACB    | 0.774035457  | Down           | Q2             |
| GEILFFK(1)DR           | MMP8      | 0.824094151  | Down           | Q2             |
| IEVEKPFIAIAK(1)E       | PPIB      | 0.463367882  | Down           | Q1             |
| GDGTGGK(1)SIYGER       | PPIB      | 0.524477713  | Down           | Q1             |
| TVPK(1)TVDNFVALATGEK   | PPIB      | 0.752950386  | Down           | Q1             |
| KVESTK(1)TDSR          | PPIB      | 0.508604004  | Down           | Q1             |
| FPDENFK(1)LK           | PPIB      | 0.55299558   | Down           | Q1             |
| SK(1)MIYASSK           | CFL1      | 0.687517342  | Down           | Q1             |
| MLPDK(1)DCR            | CFL1      | 1.833797515  | Up             | Q4             |
| HELQANCYEEVK(1)DR      | CFL1      | 2.91642882   | Up             | Q4             |
| SSTPEEVK(1)K           | CFL1      | 0.752193898  | Down           | Q1             |
| VFNDMK(1)VR            | CFL1      | 0.384673175  | Down           | Q1             |
| HLFQEK(1)K             | MPST      | 1.277794632  | Up             | Q3             |
| EK(1)GCVTEVK           | CTSS      | 0.753762104  | Down           | Q1             |
| AQSELAHQK(1)K          | PSMA1     | 1.219201851  | Up             | Q3             |
| HEIVPK(1)DIR           | PSMA3     | 0.525358445  | Down           | Q1             |
| LSAEK(1)VEIATLTR       | PSMA4     | 0.800652629  | Down           | Q2             |
| VLMEK(1)ELPGFLQSGK     | S100P     | 1.227295113  | Up             | Q3             |
| YFEK(1)AGLK            | S100P     | 0.72179505   | Down           | Q1             |
| DK(1)DAVDK             | S100P     | 2.144745081  | Up             | Q4             |
| LTPK(1)IGFPWSEIR       | MSN       | 0.659602792  | Down           | Q1             |
| LNK(1)DQWEER           | MSN       | 2.323091315  | Up             | Q4             |
| ESPLLK(1)FR            | MSN       | 0.599581639  | Down           | Q1             |
| TTEAEK(1)NER           | MSN       | 1.729470372  | Up             | Q4             |
| VLEQHK(1)LNK           | MSN       | 0.648782688  | Down           | Q1             |
| LK(1)QIEEQTK           | MSN       | 1.558876952  | Up             | Q4             |
| EK(1)EELMER            | MSN       | 0.818627259  | Down           | Q2             |
| AQSEAEK(1)LAK          | MSN       | 1.303896842  | Up             | Q4             |
| NISFNDK(1)K            | MSN       | 0.743401898  | Down           | Q1             |
| AQMVQEDLEK(1)TR        | MSN       | 1.805964706  | Up             | Q4             |
| QEAEAK(1)EALLQASR      | MSN       | 1.245608565  | Up             | Q3             |
| HQK(1)QMER             | MSN       | 1.695992533  | Up             | Q4             |
| EMAEK(1)EK             | MSN       | 1.97678165   | Up             | Q4             |
| VAGIHK(1)K             | RPL13     | 0.218968789  | Down           | Q1             |
| YSGK(1)EGDK            | S100A4    | 1.556989443  | Up             | Q4             |
| SELK(1)ELLTR           | S100A4    | 1.648573142  | Up             | Q4             |
| TMSAK(1)EK             | HMGB2     | 0.668021265  | Down           | Q1             |
| QATENAK(1)EEVR         | EEF1G     | 0.477419355  | Down           | Q1             |

Table SI. Continued. Detailed information for all identified crotonylated peptides and their corresponding proteins between the immunoglobulin A nephropathy and negative control groups.

| Modified sequence                 | Gene name | IgA/NC ratio | Regulated type | Quant category |
|-----------------------------------|-----------|--------------|----------------|----------------|
| AK(1)VIAAEGEMNASR                 | STOM      | 1.695201942  | Up             | Q4             |
| VEIK(1)DVK                        | STOM      | 0.684892791  | Down           | Q1             |
| LPDSFK(1)DSPSK                    | STOM      | 1.715367954  | Up             | Q4             |
| AK(1)LAEQAER                      | YWHAQ     | 0.552727381  | Down           | Q1             |
| NLLSVAYK(1)NVVGGRR                | YWHAQ     | 1.681932745  | Up             | Q4             |
| NVLINK(1)DIR                      | CALR      | 0.621290017  | Down           | Q1             |
| DK(1)GLQTSQDAR                    | CALR      | 0.622887701  | Down           | Q1             |
| LK(1)EEEEEDK                      | CALR      | 0.830004336  | Down           | Q2             |
| GK(1)NVLINK                       | CALR      | 0.821704027  | Down           | Q2             |
| QMK(0.989)DK(0.011)QDEEQR         | CALR      | 0.625269494  | Down           | Q1             |
| VHVIFNYK(1)GK                     | CALR      | 1.515375655  | Up             | Q4             |
| AK(0.99)IDDPTDSK(0.01)PEDWDKPEHIP | CALR      | 0.829308566  | Down           | Q2             |
| DPDAK                             |           |              |                |                |
| AAEK(1)QMK                        | CALR      | 1.213897281  | Up             | Q3             |
| AK(1)HHAISAK                      | CANX      | 1.738341793  | Up             | Q4             |
| K(1)DDTDDEIAK                     | CANX      | 0.5245946    | Down           | Q1             |
| LPGDK(1)GLVLMR                    | CANX      | 1.339275104  | Up             | Q4             |
| YK(1)SQDPR                        | TKT       | 2.712617191  | Up             | Q4             |
| NSTFSEIFK(1)K                     | TKT       | 0.639483648  | Down           | Q1             |
| ELPSGK(1)K                        | PRDX6     | 0.785865117  | Down           | Q2             |
| AAK(1)LAPEFAK                     | PRDX6     | 0.802381076  | Down           | Q2             |
| VVFVFGPK(1)K                      | PRDX6     | 0.465584404  | Down           | Q1             |
| NIVAAMK(1)AHGVVDK                 | BLVRB     | 0.657934858  | Down           | Q1             |
| THLPGFVEQAEALK(1)AK               | PRDX5     | 0.586559035  | Down           | Q1             |
| VNLAELFK(1)GK                     | PRDX5     | 0.625566751  | Down           | Q1             |
| AHK(1)AEGK                        | PRDX5     | 0.420712035  | Down           | Q1             |
| TADGIVSHLK(1)K                    | PDIA3     | 0.607095994  | Down           | Q1             |
| VMMVAK(1)K                        | PDIA3     | 0.656798359  | Down           | Q1             |
| EAATSNLK(1)K                      | PPP2R1A   | 0.612098624  | Down           | Q1             |
| K(1)IESFGSK                       | PPIF      | 0.672575862  | Down           | Q1             |
| ADVVPK(1)TAENFR                   | PPIF      | 0.470623351  | Down           | Q1             |
| NLGTTK(1)K                        | ADSS      | 0.505099119  | Down           | Q1             |
| FMK(1)EATTNAPFR                   | SERPINB1  | 2.138234428  | Up             | Q4             |
| GTVVAEK(1)DRPHEGTR                | CORO1A    | 2.519529101  | Up             | Q4             |
| GLEVNK(1)CEIAR                    | CORO1A    | 1.653559555  | Up             | Q4             |
| AK(1)LAEQAER                      | YWHAQ     | 0.409726523  | Down           | Q1             |
| SAAYAK(1)K                        | STIP1     | 1.208730032  | Up             | Q3             |
| ETKPEPMEEDLPENK(1)K               | STIP1     | 1.367488322  | Up             | Q4             |
| NQK(1)DPGVLDR                     | S100A11   | 1.431458542  | Up             | Q4             |
| LSEYGVVK(1)TDEGIAYR               | PRDX2     | 0.362130178  | Down           | Q1             |
| LSDYK(1)GK                        | PRDX2     | 0.429800968  | Down           | Q1             |
| PAPDFK(1)ATAVVDGAFK               | PRDX2     | 0.472761646  | Down           | Q1             |
| ATAVVDGAFK(1)EVK                  | PRDX2     | 0.792159763  | Down           | Q2             |
| GLFIIDGK(1)GVLR                   | PRDX2     | 0.573671568  | Down           | Q1             |
| AVSEGYK(1)DFR                     | CDA       | 0.326194446  | Down           | Q1             |
| EMTNHQK(1)K                       | KIF5B     | 0.730276172  | Down           | Q1             |
| EHLNK(1)VQTANEVK                  | KIF5B     | 0.709769777  | Down           | Q1             |
| LSLSTK(1)LK                       | MYH9      | 0.768611458  | Down           | Q1             |
| VK(1)LQEMEGTVK                    | MYH9      | 1.468710155  | Up             | Q4             |
| KLQAQMK(1)DCMR                    | MYH9      | 1.270554017  | Up             | Q3             |
| VAAYDK(1)LEK                      | MYH9      | 0.830847397  | Down           | Q2             |
| IIGLDQVAGMSETALPGAFK(1)TR         | MYH9      | 3.167668701  | Up             | Q4             |
| EQLEEEAAK(1)HNLEK                 | MYH9      | 0.598468935  | Down           | Q1             |
| QK(1)HSQAVEELAEQLEQTK             | MYH9      | 0.741681161  | Down           | Q1             |
| QSACNLEK(1)K                      | MYH9      | 0.559825211  | Down           | Q1             |
| HEEK(1)VAAYDK                     | MYH9      | 0.413034926  | Down           | Q1             |
| TDLLLEPYNK(1)YR                   | MYH9      | 0.767587743  | Down           | Q1             |
| YK(1)ASITALEAK                    | MYH9      | 1.798482429  | Up             | Q4             |

Table SI. Continued. Detailed information for all identified crotonylated peptides and their corresponding proteins between the immunoglobulin A nephropathy and negative control groups.

| Modified sequence             | Gene name | IgA/NC ratio | Regulated type | Quant category |
|-------------------------------|-----------|--------------|----------------|----------------|
| VK(1)ANLEK                    | MYH9      | 0.72619416   | Down           | Q1             |
| CQHLQAEEK(1)K                 | MYH9      | 0.584062749  | Down           | Q1             |
| IAEFTTNLTETEEEEK(1)SK         | MYH9      | 0.822958467  | Down           | Q2             |
| QVEDEK(1)NSFR                 | MYH9      | 0.828129336  | Down           | Q2             |
| HSQAVEELAEQLEQTK(1)R          | MYH9      | 1.71694321   | Up             | Q4             |
| FDQLLAEEK(1)TISAK             | MYH9      | 0.816740625  | Down           | Q2             |
| QK(1)LSLSTK                   | MYH9      | 0.740915189  | Down           | Q1             |
| K(1)LEMDLK                    | MYH9      | 1.371278757  | Up             | Q4             |
| TLEEEAK(1)THEAQIQEMR          | MYH9      | 1.27665846   | Up             | Q3             |
| NFINNPLAQADWAAK(1)K           | MYH9      | 2.177246199  | Up             | Q4             |
| AK(1)QTLENER                  | MYH9      | 0.772769903  | Down           | Q2             |
| DEQSEEK(1)K                   | MYH9      | 1.312701566  | Up             | Q4             |
| ATDK(1)SFVEK                  | MYH9      | 0.639375001  | Down           | Q1             |
| DLEAHIDSANK(1)NR              | MYH9      | 1.799824557  | Up             | Q4             |
| IAQLEEQLDNETK(1)ER            | MYH9      | 1.331234052  | Up             | Q4             |
| QAQQRDELADEIANSSGK(1)GALALEEK | MYH9      | 2.324905183  | Up             | Q4             |
| INK(1)ALDK                    | MYH9      | 0.466046285  | Down           | Q1             |
| AGK(1)LDPHLVLDQLR             | MYH9      | 1.711893074  | Up             | Q4             |
| GDSEHK(1)R                    | MYH9      | 1.541789946  | Up             | Q4             |
| TELADK(1)VTK                  | MYH9      | 0.725006249  | Down           | Q1             |
| LQLEK(1)VTTEAK                | MYH9      | 0.606071989  | Down           | Q1             |
| GALALEEK(1)R                  | MYH9      | 1.567752154  | Up             | Q4             |
| SHAQK(1)NENAR                 | MYH9      | 3.681486584  | Up             | Q4             |
| K(1)DQGELER                   | MYH9      | 0.652374524  | Down           | Q1             |
| SFVEK(1)VMQEQGTHPK            | MYH9      | 1.200120117  | Up             | Q3             |
| DDVGK(1)SVHELEK               | MYH9      | 1.917281475  | Up             | Q4             |
| EVSSLK(1)NK                   | MYH9      | 1.452718532  | Up             | Q4             |
| NAEQYK(1)DQADK                | MYH9      | 1.551682213  | Up             | Q4             |
| FVSELWK(1)DVDR                | MYH9      | 0.526358158  | Down           | Q1             |
| TEMEDLMSSK(1)DDVGK            | MYH9      | 1.241608596  | Up             | Q3             |
| VTTEAK(1)LK                   | MYH9      | 0.428663696  | Down           | Q1             |
| LK(1)DVLLQVDDERR              | MYH9      | 2.242997955  | Up             | Q4             |
| LQEMEGTVK(1)SK                | MYH9      | 1.736054325  | Up             | Q4             |
| TVGQLYK(1)EQLAK               | MYH9      | 0.51974547   | Down           | Q1             |
| ANLEK(1)AK                    | MYH9      | 0.353363152  | Down           | Q1             |
| LVWVPSDK(1)SGFEPASLK          | MYH9      | 1.389413991  | Up             | Q4             |
| QQQLTAMK(1)VLQR               | MYH9      | 1.475491006  | Up             | Q4             |
| EVQQK(1)IEK                   | TAGLN2    | 1.959851633  | Up             | Q4             |
| ILDWHVANTDK(1)K               | TALDO1    | 0.519775184  | Down           | Q1             |
| AAQASDLEK(1)IHLDEK            | TALDO1    | 0.60374751   | Down           | Q1             |
| FAADAVK(1)LER                 | TALDO1    | 0.405400502  | Down           | Q1             |
| IHLDEK(1)SFR                  | TALDO1    | 0.216638353  | Down           | Q1             |
| LSFDK(1)DAMVAR                | TALDO1    | 0.51516729   | Down           | Q1             |
| TVEGAGSIAAATGFVK(1)K          | SNCA      | 0.574339029  | Down           | Q1             |
| AK(1)EGVVAAAEK                | SNCA      | 1.650096802  | Up             | Q4             |
| NTTIPTK(1)K                   | HSPA9     | 0.475176883  | Down           | Q1             |
| TSTGAPAAIK(1)K                | CAPG      | 0.521716658  | Down           | Q1             |
| EK(1)MDLTAK                   | MDH1      | 2.211384777  | Up             | Q4             |
| ITDLMEK(1)K                   | MNDA      | 1.371642692  | Up             | Q4             |
| ELALQPK(1)DDIVDR              | GARS      | 1.719348321  | Up             | Q4             |
| FHK(1)FDADQK                  | GPD2      | 1.631687042  | Up             | Q4             |
| AK(1)EDVLQK                   | UTRN      | 0.164973498  | Down           | Q1             |
| EDSNLTLQEK(1)K                | IQGAP1    | 2.652844551  | Up             | Q4             |
| LVEDMENK(1)IR                 | CAPZB     | 1.634664401  | Up             | Q4             |
| FPLELK(1)K                    | LIMS1     | 2.502632806  | Up             | Q4             |
| IYIDDNNK(1)K                  | PIP4K2A   | 1.427466176  | Up             | Q4             |
| AAHAAK(1)TVK                  | PIP4K2A   | 1.80379655   | Up             | Q4             |
| ELPTLK(1)DNDFINEGQK           | PIP4K2A   | 0.827409704  | Down           | Q2             |

Table SI. Continued. Detailed information for all identified crotonylated peptides and their corresponding proteins between the immunoglobulin A nephropathy and negative control groups.

| Modified sequence         | Gene name | IgA/NC ratio | Regulated type | Quant category |
|---------------------------|-----------|--------------|----------------|----------------|
| GVQLQTHPNVDK(1)K          | ARCN1     | 0.630796378  | Down           | Q1             |
| LHVENEDK(1)K              | ARCN1     | 0.743008029  | Down           | Q1             |
| GEFNEK(1)K                | CD151     | 0.417347352  | Down           | Q1             |
| QLK(1)DSEER               | GSS       | 0.679207434  | Down           | Q1             |
| HK(1)LDVTSVEDYK           | CCT5      | 1.440979437  | Up             | Q4             |
| GK(1)LDGNQDLIR            | IDH2      | 2.421225716  | Up             | Q4             |
| TDFDK(1)NK                | IDH2      | 0.532434169  | Down           | Q1             |
| NK(1)IWYEHR               | IDH2      | 1.723220192  | Up             | Q4             |
| NVQLYK(1)MR               | PSMB2     | 1.530625394  | Up             | Q4             |
| GSFDISCDKDNK(1)R          | CAMP      | 0.449894504  | Down           | Q1             |
| TTQQSPEDCDFK(1)K          | CAMP      | 0.43329468   | Down           | Q1             |
| K(1)VLHMDR                | GDI2      | 0.563712835  | Down           | Q1             |
| AVDDGVNTFK(1)VLTR         | CCT8      | 0.479818963  | Down           | Q1             |
| VVGAQSLK(1)EMVSK          | PGD       | 0.631103842  | Down           | Q1             |
| AK(1)GILFVGSVSGGEEGAR     | PGD       | 0.510120687  | Down           | Q1             |
| CLSSLK(1)DER              | PGD       | 0.693986542  | Down           | Q1             |
| EMVSK(1)LK                | PGD       | 0.704434941  | Down           | Q1             |
| FQFDGDK(1)K               | PGD       | 0.638834149  | Down           | Q1             |
| YK(1)EALLGR               | ARHGDIA   | 1.828767123  | Up             | Q4             |
| SIQEIQLDK(1)DDESLR        | ARHGDIA   | 1.573951435  | Up             | Q4             |
| IHFK(1)VNR                | ARHGDIB   | 0.397757296  | Down           | Q1             |
| TGVK(1)VDK                | ARHGDIB   | 0.748888859  | Down           | Q1             |
| YIEVFK(1)SHR              | HNRNPF    | 1.530876543  | Up             | Q4             |
| ILSYK(1)JGK               | CAPZA1    | 0.570145057  | Down           | Q1             |
| ISFK(1)FDHLR              | CAPZA1    | 0.585589667  | Down           | Q1             |
| LLGQFSEK(1)ELAAEK         | BLVRA     | 1.371626817  | Up             | Q4             |
| ELAAEK(1)K                | BLVRA     | 1.246504254  | Up             | Q3             |
| GQPDEELK(0.044)PK(0.956)K | YARS      | 1.643337453  | Up             | Q4             |
| EK(1)ESVNAK               | USP14     | 1.277792857  | Up             | Q3             |
| EK(1)IEAEK                | RAD23A    | 0.68191482   | Down           | Q1             |
| LLLSK(1)GADK              | MTPN      | 1.419941983  | Up             | Q4             |
| GADK(1)TVK                | MTPN      | 1.979124692  | Up             | Q4             |
| DYVAK(1)GEDVNR            | MTPN      | 1.451050115  | Up             | Q4             |
| ILCHK(1)FMR               | ARPC4     | 0.51859592   | Down           | Q1             |
| TATPQQAQEVHEK(1)LR        | TPI1      | 1.29212444   | Up             | Q3             |
| VVFEQTK(1)VIADNVK         | TPI1      | 0.623354818  | Down           | Q1             |
| VIADNVK(1)DWSK            | TPI1      | 0.552684635  | Down           | Q1             |
| VLGNPK(1)SDEMNVK          | MYL6      | 0.790147123  | Down           | Q2             |
| K(1)EELTLEGIR             | EIF4A1    | 0.73026118   | Down           | Q1             |
| QKPITPETAEK(1)LAR         | CDC42     | 0.782462812  | Down           | Q2             |
| NVFDEAILAALEPPEPK(1)K     | CDC42     | 0.656267155  | Down           | Q1             |
| TGENVEDAFLEAAK(1)K        | RAB14     | 1.42549823   | Up             | Q4             |
| LK(1)LSEELSGGR            | ACTR3     | 1.215905196  | Up             | Q3             |
| ESAK(1)VGDAQQR            | ACTR3     | 0.773210243  | Down           | Q2             |
| QYTGINAISK(1)K            | ACTR3     | 0.478850596  | Down           | Q1             |
| QEYQEK(1)GVR              | ACTR2     | 0.692499505  | Down           | Q1             |
| VLK(1)GDVEK               | ACTR2     | 0.798092372  | Down           | Q2             |
| VK(1)DTDDVPMILVGNK        | RAP1B     | 0.797329725  | Down           | Q2             |
| VKDTDDVPMILVGNK(1)CDLEDER | RAP1B     | 2.1065549    | Up             | Q4             |
| EYK(1)LVVLGSGGVGK         | RAP1B     | 1.996241688  | Up             | Q4             |
| TSADGNEK(1)K              | YWHAG     | 0.734220702  | Down           | Q1             |
| EAFSLFDK(1)DGDGTITTK      | CALM1     | 2.593774418  | Up             | Q4             |
| MK(1)DTDSEEEIR            | CALM1     | 2.351555996  | Up             | Q4             |
| NLLSVAYK(1)NVIGAR         | YWHAE     | 1.292823397  | Up             | Q3             |
| MK(1)GDYHR                | YWHAE     | 0.711884183  | Down           | Q1             |
| AHPPELK(1)K               | SNRPG     | 0.727966383  | Down           | Q1             |
| TVTAMDVVYALK(1)R          | HIST1H4A  | 3.729548591  | Up             | Q4             |
| DAVTYTEHAK(1)R            | HIST1H4A  | 1.338684654  | Up             | Q4             |

Table SI. Continued. Detailed information for all identified crotonylated peptides and their corresponding proteins between the immunoglobulin A nephropathy and negative control groups.

| Modified sequence         | Gene name | IgA/NC ratio | Regulated type | Quant category |
|---------------------------|-----------|--------------|----------------|----------------|
| AK(1)SIVFHR               | RAN       | 3.465207923  | Up             | Q4             |
| HVVFGK(1)VK               | PPIA      | 0.697625665  | Down           | Q1             |
| VSFELFADK(1)VPK           | PPIA      | 0.465754584  | Down           | Q1             |
| TEWLDGK(1)HVVFGK          | PPIA      | 0.282740095  | Down           | Q1             |
| VK(1)EGMNIVEAMER          | PPIA      | 0.483144242  | Down           | Q1             |
| ALSTGEK(1)GFGYK           | PPIA      | 0.395557535  | Down           | Q1             |
| SIYGEK(1)FEDENFILK        | PPIA      | 0.709044195  | Down           | Q1             |
| FMLGK(1)QEVIR             | FKBP1A    | 0.57344703   | Down           | Q1             |
| FGNDVQHFK(1)VLR           | GRB2      | 0.798651517  | Down           | Q2             |
| AK(1)AEEMLSK              | GRB2      | 0.743720011  | Down           | Q1             |
| DDKDTIEK(1)LK             | RAC1      | 1.848684067  | Up             | Q4             |
| LDLRDDK(1)DTIEK           | RAC1      | 1.544407022  | Up             | Q4             |
| TIINADK(1)DGDGR           | PPP3R1    | 1.48003268   | Up             | Q4             |
| TEGAEK(1)K                | YWHAZ     | 0.553987421  | Down           | Q1             |
| AK(1)LAEQAER              | YWHAZ     | 0.68287493   | Down           | Q1             |
| VFYLK(1)MK                | YWHAZ     | 1.333450815  | Up             | Q4             |
| YLAEVAAGDDK(1)K           | YWHAZ     | 1.358344844  | Up             | Q4             |
| VVSSIEQK(1)TEGAEK         | YWHAZ     | 1.48607753   | Up             | Q4             |
| NELVQK(1)AK               | YWHAZ     | 2.642421312  | Up             | Q4             |
| MK(1)GDYYR                | YWHAZ     | 0.551760235  | Down           | Q1             |
| K(1)EMQPTHPIR             | YWHAZ     | 0.823949734  | Down           | Q2             |
| NLLSVAYK(1)NVVGAR         | YWHAZ     | 0.508378216  | Down           | Q1             |
| GIVDQSQAYQEAFEISK(1)K     | YWHAZ     | 0.686924059  | Down           | Q1             |
| MQK(1)EITALAPSTMK         | ACTG1     | 0.75296121   | Down           | Q1             |
| HQGVMVGMGQK(1)DSYVGDEAQSK | ACTG1     | 1.29050185   | Up             | Q3             |
| K(1)DLYANTVLSGGTTMYPGIADR | ACTG1     | 1.59052348   | Up             | Q4             |
| IK(1)IIAPPER              | ACTG1     | 0.73180527   | Down           | Q1             |
| EITALAPSTMK(1)IK          | ACTG1     | 0.414826327  | Down           | Q1             |
| VAPEEHPVLLTEAPLNPK(1)ANR  | ACTG1     | 1.610312914  | Up             | Q4             |
| AEVSELK(1)CGDLEELK        | TPM4      | 4.574349481  | Up             | Q4             |
| LEK(1)TIDDLEEK            | TPM4      | 4.628966804  | Up             | Q4             |
| TVAK(1)LEK                | TPM4      | 2.679032952  | Up             | Q4             |
| EAK(1)HIAEEADR            | TPM4      | 1.909749389  | Up             | Q4             |
| NVTNNLK(1)SLEAASEK        | TPM4      | 1.962326435  | Up             | Q4             |
| EK(1)AEGDVAALNR           | TPM4      | 2.49047669   | Up             | Q4             |
| LLSDK(1)LK                | TPM4      | 2.564422249  | Up             | Q4             |
| LSVDYGK(1)K               | TUBA4A    | 1.793106109  | Up             | Q4             |
| GDVVPK(1)DVNAAIAAIK       | TUBA4A    | 1.884068129  | Up             | Q4             |
| QLFHPEQLITGK(1)EDAANNYAR  | TUBA4A    | 3.167095116  | Up             | Q4             |
| LDHK(1)FDLMYAK            | TUBA4A    | 4.807450901  | Up             | Q4             |
| FFESFGDLSTPDVAVMGNPK(1)VK | HBB       | 2.918451276  | Up             | Q4             |
| SAVTALWGK(1)VNVDEVGGEALGR | HBB       | 4.545084474  | Up             | Q4             |
| VVAGVANALAHK(1)YH         | HBB       | 0.586410535  | Down           | Q1             |
| GTFATLSELHCDK(1)LHVDPENFR | HBB       | 0.648548863  | Down           | Q1             |
| VK(1)AHGK(1)K             | HBB       | 0.519289326  | Down           | Q1             |
| VLSPADK(1)TNVK(1)AAWGK    | HBA1      | 1.568691719  | Up             | Q4             |
| TYFPFDLSHGSAQVK(1)GHGK    | HBA1      | 1.466819673  | Up             | Q4             |
| AAWGK(1)VGAHAGEYGAEALER   | HBA1      | 0.595452322  | Down           | Q1             |
| LLTHHK(1)DHFTK            | CCT2      | 0.776243155  | Down           | Q2             |
| EFTK(1)LEEVLTK            | GSTO1     | 0.558468233  | Down           | Q1             |
| LNECVDHTPK(1)LK           | GSTO1     | 0.735042748  | Down           | Q1             |
| LEEVLTK(1)K               | GSTO1     | 0.520772974  | Down           | Q1             |
| NKPEWFFK(1)K              | GSTO1     | 0.591051134  | Down           | Q1             |
| TK(1)ELTSELK              | LCN2      | 0.758510293  | Down           | Q1             |
| ELTSELK(1)ENFIR           | LCN2      | 0.461055276  | Down           | Q1             |
| EDK(1)DPQK                | LCN2      | 2.183096734  | Up             | Q4             |
| K(1)GHFDTLSK              | S100A12   | 0.612909656  | Down           | Q1             |
| GHFDTLSK(1)GELK           | S100A12   | 0.772561699  | Down           | Q2             |

Table SI. Continued. Detailed information for all identified crotonylated peptides and their corresponding proteins between the immunoglobulin A nephropathy and negative control groups.

| Modified sequence   | Gene name | IgA/NC ratio | Regulated type | Quant category |
|---------------------|-----------|--------------|----------------|----------------|
| AAHYHTHK(1)E        | S100A12   | 1.655428021  | Up             | Q4             |
| MYK(1)EEGLK         | SLC25A3   | 1.415440724  | Up             | Q4             |
| EK(1)GSSASLVLK      | SLC25A3   | 2.095005928  | Up             | Q4             |
| VIALK(1)AGK         | CLTC      | 1.449969731  | Up             | Q4             |
| AQLQK(1)GMVK        | CLTC      | 0.824763582  | Down           | Q2             |
| AHIAQLCEK(1)AGLLQR  | CLTC      | 2.725871314  | Up             | Q4             |
| VNIPK(1)VLR         | CLTC      | 1.418855698  | Up             | Q4             |
| VDK(1)LDASESLR      | CLTC      | 1.683901126  | Up             | Q4             |
| HLYTK(1)DIDIHEVR    | HNRNPU    | 1.303028731  | Up             | Q4             |
| IQEK(1)VDSIDDR      | SPTBN1    | 0.804824817  | Down           | Q2             |
| EK(1)LTGLHK         | SPTBN1    | 0.599444341  | Down           | Q1             |
| HAEMVHTGLK(1)LER    | CAP1      | 1.261957087  | Up             | Q3             |
| EYK(1)DVDK          | CAP1      | 0.70287358   | Down           | Q1             |
| ISEK(1)EEVTTR       | LMNB2     | 0.480725262  | Down           | Q1             |
| AQLAK(1)AEDGHAVAK   | LMNB2     | 0.542666776  | Down           | Q1             |
| YLAEVASGEK(1)K      | YWHAH     | 1.728870293  | Up             | Q4             |
| FNVSYLK(1)R         | CLC       | 0.401071787  | Down           | Q1             |
| GDASLK(1)MDK        | CD47      | 1.237892819  | Up             | Q3             |
| IEVSQLLK(1)GDASLK   | CD47      | 0.695978391  | Down           | Q1             |
| K(1)GSVVTNER        | MMRN1     | 3.762294648  | Up             | Q4             |
| VIEPK(1)DIHAK       | SELENBP1  | 0.75805709   | Down           | Q1             |
| HSGIDFK(1)QLNFLT    | ILK       | 0.476476527  | Down           | Q1             |
| AEK(1)MGQNLNR       | ILK       | 0.608478087  | Down           | Q1             |
| HK(1)ASVEDADTQSK    | DCTN2     | 0.441127798  | Down           | Q1             |
| LHK(1)AQEEHR        | STIM1     | 1.525376544  | Up             | Q4             |
| GCFK(1)AIVAGDQNVEYK | FHL1      | 3.919102844  | Up             | Q4             |
| EVHYK(1)NR          | FHL1      | 2.513895265  | Up             | Q4             |
| FAK(1)HCVK          | FHL1      | 0.829016199  | Down           | Q2             |
| AK(1)LGDSHDLQR      | SPTAN1    | 0.794986841  | Down           | Q2             |
| TGTDK(1)TLVK        | COTL1     | 1.463343129  | Up             | Q4             |
| K(1)ELEEDFIK        | COTL1     | 1.45908092   | Up             | Q4             |
| VMDQK(1)EHK         | HNRNPD    | 1.754131316  | Up             | Q4             |
| EEEPVK(1)K          | HNRNPD    | 2.451163581  | Up             | Q4             |
| EK(1)EAELK          | 06-Sep    | 0.679325414  | Down           | Q1             |
| EAEK(1)ELHEK        | 06-Sep    | 1.386376852  | Up             | Q4             |
| ADAISK(1)SELT       | 06-Sep    | 1.607166204  | Up             | Q4             |
| LHQDEK(1)K          | 06-Sep    | 0.757846213  | Down           | Q1             |
| SLDLVTMK(1)K        | 06-Sep    | 0.778271794  | Down           | Q2             |
| EAELEAK(1)ER        | DCTN1     | 0.830835195  | Down           | Q2             |
| EK(1)QEAAPLVR       | RASA3     | 1.415265133  | Up             | Q4             |
| NSLDDSAK(1)K        | SPCS2     | 0.540514583  | Down           | Q1             |
| VIPGAAEK(1)IER      | 02-Sep    | 1.669354207  | Up             | Q4             |
| LTPEWK(1)K          | PDIA6     | 0.726633201  | Down           | Q1             |
| SAEAEQSK(1)R        | PLEC      | 0.613216806  | Down           | Q1             |
| ASFEK(1)AAAGK       | PLEC      | 0.632139734  | Down           | Q1             |
| VTVEK(1)VIK         | PLEC      | 0.784303292  | Down           | Q2             |
| QK(1)GLVEDTLR       | PLEC      | 1.419251221  | Up             | Q4             |
| SK(1)EQAELEAAR      | PLEC      | 0.573184485  | Down           | Q1             |
| NTNMTAK(1)K         | PLEC      | 0.529750665  | Down           | Q1             |
| EK(1)EAENER         | PLEC      | 0.140229236  | Down           | Q1             |
| EVGSIIGK(1)K        | PCBP1     | 0.463482607  | Down           | Q1             |
| LK(1)HLNLGMNR       | RSU1      | 1.267581306  | Up             | Q3             |
| HMQANPEPPK(1)K      | RSU1      | 2.574329637  | Up             | Q4             |
| LALEGVEK(1)ER       | MAPRE2    | 1.850478658  | Up             | Q4             |
| ANIK(1)DLSQILK      | STXBP2    | 0.820526951  | Down           | Q2             |
| HFK(1)GSVEK         | STXBP2    | 0.590488372  | Down           | Q1             |
| EHVAK(1)MK          | 07-Sep    | 0.804344992  | Down           | Q2             |
| EIQEHK(1)IK         | 07-Sep    | 0.701925581  | Down           | Q1             |

Table SI. Continued. Detailed information for all identified crotonylated peptides and their corresponding proteins between the immunoglobulin A nephropathy and negative control groups.

| Modified sequence          | Gene name | IgA/NC ratio | Regulated type | Quant category |
|----------------------------|-----------|--------------|----------------|----------------|
| AAMDNSEIAGEK(1)K           | IMMT      | 1.369233606  | Up             | Q4             |
| SVIENAK(1)K                | IMMT      | 0.541386501  | Down           | Q1             |
| SEASSNLK(1)K               | INF2      | 0.570996908  | Down           | Q1             |
| VSAVEVWGK(1)EENLR          | KIF26B    | 0.456582999  | Down           | Q1             |
| AAGAGK(1)VTK               | EEF1A1P5  | 2.010918207  | Up             | Q4             |
| FEK(1)EAAEMGK              | EEF1A1P5  | 1.306198153  | Up             | Q4             |
| DQGK(1)VTDTASMK            | PLBD1     | 0.473168885  | Down           | Q1             |
| FEK(1)ELSK                 | OLFM4     | 0.52369862   | Down           | Q1             |
| DAHVAK(1)GK                | BZW1      | 0.687682183  | Down           | Q1             |
| EQADFALEALAK(1)ATYER       | MYH14     | 1.651779063  | Up             | Q4             |
| SFFEAK(1)K                 | TMED4     | 0.588956851  | Down           | Q1             |
| YYSFFDLDPK(1)TDPVR         | FERMT3    | 1.596704913  | Up             | Q4             |
| LEFEK(1)HR                 | TRIM58    | 0.393613706  | Down           | Q1             |
| GLQQENHLK(1)IR             | UBASH3B   | 1.511187873  | Up             | Q4             |
| TEVHVVEPHK(1)K             | UBASH3B   | 0.799381336  | Down           | Q2             |
| NLDITK(1)K                 | ARHGEF1   | 0.476937191  | Down           | Q1             |
| NDEELNK(1)LLGR             | HIST1H2AC | 2.110383686  | Up             | Q4             |
| K(1)LDEFGR                 | ATP2A3    | 1.244824605  | Up             | Q3             |
| AVNQDK(1)K                 | ATP2A3    | 0.534067353  | Down           | Q1             |
| VIFLSK(1)GK                | WBP2      | 0.772018461  | Down           | Q2             |
| EILK(1)EQENR               | PARK7     | 0.772262914  | Down           | Q2             |
| SQDK(1)TLK                 | MGLL      | 1.615105357  | Up             | Q4             |
| TATQLAVNK(1)IK             | CCT7      | 0.552954158  | Down           | Q1             |
| NDEELNK(1)LLGK             | HIST1H2AJ | 8.419275745  | Up             | Q4             |
| VRDEK(1)ER                 | ESYT1     | 0.355925072  | Down           | Q1             |
| TIELDGK(1)TIK              | RAB1B     | 1.613846812  | Up             | Q4             |
| DK(1)DEAEQAVSR             | PSTPIP2   | 0.790519796  | Down           | Q2             |
| SLITFVVK(1)HLNK            | PARVB     | 1.794051631  | Up             | Q4             |
| NVK(1)DAMAK                | RTN4      | 0.453927813  | Down           | Q1             |
| DAMAK(1)IQAK               | RTN4      | 0.818625531  | Down           | Q2             |
| TDAISEEK(1)LR              | SAR1A     | 1.587254497  | Up             | Q4             |
| EK(1)IEASR                 | ARL8B     | 0.535910763  | Down           | Q1             |
| VDTTK(1)VK                 | CMTM6     | 0.596188554  | Down           | Q1             |
| SK(1)LLPLEEHYR             | EHD3      | 1.481731634  | Up             | Q4             |
| ITGANAK(1)K                | EHD3      | 7.625227122  | Up             | Q4             |
| ALK(1)NHEDK                | EHD3      | 0.588439967  | Down           | Q1             |
| NEK(1)GQLGHGDTK            | RCC2      | 0.747802541  | Down           | Q1             |
| HHLEAVQNAK(1)K             | BIN2      | 0.337727034  | Down           | Q1             |
| TAK(1)AEEEFNK              | BIN2      | 0.71340254   | Down           | Q1             |
| AVETK(1)DER                | BIN2      | 0.696989871  | Down           | Q1             |
| VK(1)DPNSGLPK              | DBNL      | 1.333088095  | Up             | Q4             |
| TK(1)VEAFQTTISK            | PSME2     | 0.826670522  | Down           | Q2             |
| K(1)QEIVAEK                | CORO1C    | 1.561858807  | Up             | Q4             |
| KQEIVAEK(1)EK              | CORO1C    | 1.201225874  | Up             | Q3             |
| TTDTASVQNEAK(1)LDEILK      | CORO1C    | 1.979172444  | Up             | Q4             |
| FFK(1)LHER                 | CORO1C    | 1.589742732  | Up             | Q4             |
| GLDVNK(1)CEIAR             | CORO1C    | 2.711663369  | Up             | Q4             |
| EVEAAK(1)K                 | PACSIN2   | 0.441809794  | Down           | Q1             |
| AAK(1)DVFNK                | VDAC3     | 1.203638445  | Up             | Q3             |
| GVIQHK(1)EK                | UFC1      | 1.281037834  | Up             | Q3             |
| MATNAAAQNAIK(1)K           | TLN1      | 0.779842864  | Down           | Q2             |
| MTK(1)GITMATAK             | TLN1      | 0.780408954  | Down           | Q2             |
| TVSDSIK(1)K                | TLN1      | 0.723104605  | Down           | Q1             |
| ASDNLVK(1)AAQK             | TLN1      | 0.78573684   | Down           | Q2             |
| TTNPTAK(1)R                | TLN1      | 0.705204879  | Down           | Q1             |
| AGALQCSPSDAYTK(1)K         | TLN1      | 1.273516222  | Up             | Q3             |
| TLLRDEK(1)K                | TLN1      | 0.090682824  | Down           | Q1             |
| IPEAPAGPPSDFGLFLSDDDPK(1)K | TLN1      | 0.472935846  | Down           | Q1             |

Table SI. Continued. Detailed information for all identified crotonylated peptides and their corresponding proteins between the immunoglobulin A nephropathy and negative control groups.

| Modified sequence                       | Gene name | IgA/NC ratio | Regulated type | Quant category |
|-----------------------------------------|-----------|--------------|----------------|----------------|
| DVAK(1)ALGDLISATK                       | TLN1      | 0.464441067  | Down           | Q1             |
| TK(1)EVIQEWNLNIK                        | TLN1      | 0.672393674  | Down           | Q1             |
| TAK(1)VLVEDTK                           | TLN1      | 0.733862754  | Down           | Q1             |
| VLVEDTK(1)VLVQNAAGSQEK                  | TLN1      | 0.397512346  | Down           | Q1             |
| K(1)IFQAHK                              | TLN1      | 0.644559981  | Down           | Q1             |
| TAK(1)AIAVTVQEMVTK                      | TLN1      | 0.421876245  | Down           | Q1             |
| NCGQMSEIEAK(1)VR                        | TLN1      | 1.601704245  | Up             | Q4             |
| AAAGK(1)VGDDPAVWQLK                     | TLN1      | 0.415177799  | Down           | Q1             |
| LK(0.001)PLPGETMEK(0.999)CTQDL<br>GNSTK | TLN1      | 3.38014905   | Up             | Q4             |
| NK(1)MDESK                              | TLN1      | 4.147863343  | Up             | Q4             |
| TVK(1)AVEDEATK                          | TLN1      | 0.526612491  | Down           | Q1             |
| VK(1)ADQDSEAMK                          | TLN1      | 1.276340811  | Up             | Q3             |
| K(1)EEITGTLR                            | TLN1      | 0.655851183  | Down           | Q1             |
| TIK(1)ALDGAFTEENR                       | TLN1      | 1.401773563  | Up             | Q4             |
| AQVVSNLK(1)GISMSSSK                     | TLN1      | 0.805151881  | Down           | Q2             |
| ELMEEK(1)K                              | TLN1      | 0.57939308   | Down           | Q1             |
| AVEDEATK(1)GTR                          | TLN1      | 1.22334462   | Up             | Q3             |
| QK(1)LHTDDELNWLHDHGR                    | TLN1      | 2.196908621  | Up             | Q4             |

IgA, immunoglobulin A nephropathy; NC, negative control.
